# Supplementary material for: Antioxidant and UV-radiation absorption activity of aaptamine derivatives – potential application for natural organic sunscreens
Source: Royal Society of Chemistry journal article supplement (doi:10.1039/d1ra04146k), 2021-01-01
Supplement: d1ra04146k1.pdf [file d1ra04146k1.pdf]

## Supporting information

*for*

*the manuscript entitled:*

### **Antioxidant and UV-radiation absorption activity of aaptamine derivatives – Potential application for natural organic sunscreens**

Thi Le Anh Nguyen<sup>1,2,\*</sup>, Doan Thi Hoai Nam<sup>3</sup>, Dinh Hieu Truong<sup>1,2</sup>, Nguyen Thi Ai Nhung<sup>4</sup>, Duong Tuan Quang<sup>5</sup>, Dorra Khiri<sup>6</sup>, Sonia Taamalli<sup>6</sup>, Florent Louis<sup>6</sup>, Abderrahman El Bakali<sup>6</sup> and Duy Quang Dao<sup>1,\*</sup>

<sup>1</sup>*Institute of Research and Development, Duy Tan University, Da Nang, 550000, Vietnam*

<sup>2</sup>*Faculty of Natural Sciences, Duy Tan University, Da Nang, 550000, Vietnam*

<sup>3</sup>*Department of Chemistry, Danang University of Science and Technology - The University of Danang, Da Nang, 550000, Vietnam*

<sup>4</sup>*Department of Chemistry, University of Sciences, Hue University, Hue, 530000, Vietnam*

<sup>5</sup>*Department of Chemistry, University of Education, Hue University, Hue, 530000, Vietnam*

<sup>6</sup>*Université de Lille, CNRS, UMR 8522 – PC2A – PhysicoChimie des Processus de Combustion et de l'Atmosphère, 59000 Lille, France*

### List of supporting information

**Table S1:** Cartesian coordinates, and thermochemical properties of three aaptamines derivatives. All calculations are performed in the gas phase at the M05-2X/6-311++G(d,p) level of theory.

**Table S2:** Cartesian coordinates, and thermochemical properties for TSs of **HAT reactions** between three aaptamines derivatives with HOO radical. All calculations were performed in the gas phase and in water at the M05-2X/6-311++G(d,p) level of theory.

**Table S3:** Cartesian coordinates, and thermochemical properties for TSs of **RAF reactions** between three aaptamines derivatives with HOO radical. All calculations were performed in the gas phase and in water at the M05-2X/6-311++G(d,p) level of theory.

**Table S4:** NBO analysis investigated at the transition states (TSs) of FHT reactions between C1–C3 compounds and HOO• radical

**Table S5:** NPA charges, atomic spin densities (ASD), natural electron configuration (NEC) calculated at the transition states (TSs) for shifting-H, donor and acceptor of C1 – C3.

**Table S6:** Cartesian coordinates, and thermochemical properties for the complexes between three aaptamines derivatives with **Cu(II)** ion. All calculations were performed in water at the M05-2X/6-311++G(d,p) level of theory.

**Table S7:** Cartesian coordinates, and thermochemical properties for the complexes between three aaptamines derivatives with **Cu(I)** ion. All calculations were performed in water at the M05-2X/6-311++G(d,p) level of theory.

**Table S8:** Lowest absorption wavelength (nm) of C1–C3 calculated by TD-DFT with different methods of various % HF in exchange correlation.

**Table S1:** Cartesian coordinates, and thermochemical properties of three aptamines derivatives. All calculations are performed in the gas phase at the M05-2X/6-311++G(d,p) level of theory.

| Compound C1                                  |                             |             |             |
|----------------------------------------------|-----------------------------|-------------|-------------|
| 0 1                                          |                             |             |             |
| C                                            | 0.29937700                  | 0.57206100  | -0.01561900 |
| C                                            | -0.97304000                 | 1.16268700  | -0.02280400 |
| C                                            | 0.41181300                  | -0.83151400 | -0.03892800 |
| C                                            | 1.43989700                  | 1.42022900  | 0.01705900  |
| C                                            | -2.10357200                 | 0.29561000  | -0.05789400 |
| C                                            | -1.87089400                 | -1.09213700 | -0.08303600 |
| C                                            | 2.76262700                  | 0.83527200  | 0.02753100  |
| C                                            | -0.11339000                 | 3.26368500  | 0.02519200  |
| C                                            | 2.92159000                  | -0.50611000 | 0.00784500  |
| H                                            | 3.60838000                  | 1.50688100  | 0.05184400  |
| H                                            | -0.28388200                 | 4.33394200  | 0.03982300  |
| O                                            | 4.08878900                  | -1.15187800 | 0.01577000  |
| C                                            | 5.27167300                  | -0.36988900 | 0.04732100  |
| H                                            | 6.09431200                  | -1.07637300 | 0.04857700  |
| H                                            | 5.33184300                  | 0.26961800  | -0.83520500 |
| H                                            | 5.30375100                  | 0.24010000  | 0.95192700  |
| C                                            | 1.75205300                  | -1.46121700 | -0.02679400 |
| O                                            | 1.94355400                  | -2.65185700 | -0.04323500 |
| N                                            | -0.65187400                 | -1.61995600 | -0.06743100 |
| C                                            | 1.21171700                  | 2.77726200  | 0.03768600  |
| H                                            | 2.03567600                  | 3.47744900  | 0.06257600  |
| N                                            | -1.18059600                 | 2.50232000  | -0.00421100 |
| C                                            | -3.05352000                 | -2.02490300 | -0.11943700 |
| H                                            | -2.78468400                 | -2.93512400 | 0.41350100  |
| H                                            | -3.25840100                 | -2.30704600 | -1.15606700 |
| N                                            | -3.34737400                 | 0.81745700  | -0.05796400 |
| H                                            | -3.40435100                 | 1.82262300  | -0.08956400 |
| C                                            | -4.53516700                 | -0.01033800 | -0.17917700 |
| H                                            | -5.36420200                 | 0.51180800  | 0.29563300  |
| H                                            | -4.78915000                 | -0.16228100 | -1.23316600 |
| C                                            | -4.28683600                 | -1.35766400 | 0.48943600  |
| H                                            | -5.16522700                 | -1.99043400 | 0.36890400  |
| H                                            | -4.12986500                 | -1.19825300 | 1.55789200  |
| <b>Thermochemistry</b>                       |                             |             |             |
| Zero-point correction=                       | 0.264703 (Hartree/Particle) |             |             |
| Thermal correction to Energy=                | 0.280018                    |             |             |
| Thermal correction to Enthalpy=              | 0.280962                    |             |             |
| Thermal correction to Gibbs Free Energy=     | 0.222313                    |             |             |
| Sum of electronic and zero-point Energies=   | -894.004848                 |             |             |
| Sum of electronic and thermal Energies=      | -893.989533                 |             |             |
| Sum of electronic and thermal Enthalpies=    | -893.988589                 |             |             |
| Sum of electronic and thermal Free Energies= | -894.047238                 |             |             |
| HF=-894.2695509 (Hartree/Particle)           |                             |             |             |

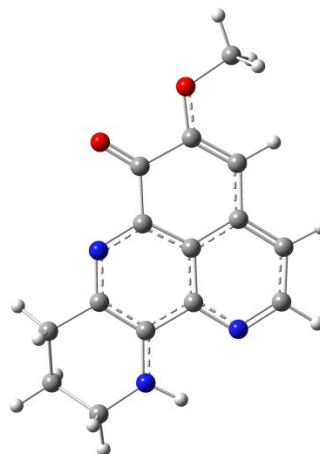

| Compound C2                                  |                             |             |             |                                                                                    |
|----------------------------------------------|-----------------------------|-------------|-------------|------------------------------------------------------------------------------------|
| 0 1                                          |                             |             |             | 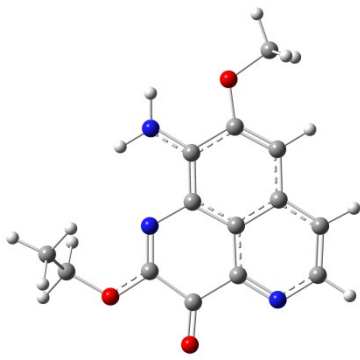 |
| O                                            | -3.36091700                 | -1.98068300 | -0.03052500 |                                                                                    |
| N                                            | 0.37717400                  | 3.18955600  | 0.07731900  |                                                                                    |
| N                                            | 1.21692000                  | -0.92121800 | -0.19829000 |                                                                                    |
| C                                            | -0.41006200                 | 0.91360700  | -0.01880900 |                                                                                    |
| C                                            | -1.75426500                 | 1.34060800  | 0.07385300  |                                                                                    |
| C                                            | -0.09111700                 | -0.46020600 | -0.11498500 |                                                                                    |
| C                                            | 0.60586900                  | 1.88948300  | -0.01040900 |                                                                                    |
| C                                            | -1.10722100                 | -1.39927300 | -0.12868900 |                                                                                    |
| C                                            | -2.79402000                 | 0.36525700  | 0.07219800  |                                                                                    |
| C                                            | -2.47395100                 | -0.95580500 | -0.02478300 |                                                                                    |
| C                                            | -1.97580200                 | 2.71719300  | 0.16577000  |                                                                                    |
| C                                            | 2.01668000                  | 1.43158800  | -0.10553200 |                                                                                    |
| C                                            | -0.89526500                 | 3.58480000  | 0.16299600  |                                                                                    |
| C                                            | 2.17498800                  | -0.07361900 | -0.19856700 |                                                                                    |
| C                                            | -4.74024200                 | -1.65503800 | 0.06601200  |                                                                                    |
| H                                            | -3.81922100                 | 0.69382200  | 0.14962600  |                                                                                    |
| H                                            | -2.98292500                 | 3.10590900  | 0.23908300  |                                                                                    |
| H                                            | -1.05604500                 | 4.65303500  | 0.23342800  |                                                                                    |
| H                                            | -5.27292400                 | -2.59948400 | 0.04113700  |                                                                                    |
| H                                            | -5.04519400                 | -1.03529700 | -0.77814900 |                                                                                    |
| H                                            | -4.94553200                 | -1.13755100 | 1.00408200  |                                                                                    |
| O                                            | 2.97574800                  | 2.15715500  | -0.10847400 |                                                                                    |
| O                                            | 3.44795700                  | -0.43862900 | -0.28926400 |                                                                                    |
| C                                            | 3.74225300                  | -1.84342000 | -0.37492300 |                                                                                    |
| H                                            | 4.73907800                  | -1.87684600 | -0.80537700 |                                                                                    |
| H                                            | 3.03407500                  | -2.31025200 | -1.05702900 |                                                                                    |
| C                                            | 3.71519800                  | -2.49194300 | 0.99523500  |                                                                                    |
| H                                            | 2.71656500                  | -2.44666000 | 1.42446900  |                                                                                    |
| H                                            | 4.01371600                  | -3.53742800 | 0.91114000  |                                                                                    |
| H                                            | 4.41145900                  | -1.98567500 | 1.66209000  |                                                                                    |
| N                                            | -0.86073500                 | -2.72622600 | -0.26033300 |                                                                                    |
| H                                            | 0.09664300                  | -3.02340900 | -0.19684100 |                                                                                    |
| H                                            | -1.60376800                 | -3.37707400 | -0.08863300 |                                                                                    |
| <u>Thermochemistry</u>                       |                             |             |             |                                                                                    |
| Zero-point correction=                       | 0.260503 (Hartree/Particle) |             |             |                                                                                    |
| Thermal correction to Energy=                | 0.277666                    |             |             |                                                                                    |
| Thermal correction to Enthalpy=              | 0.278610                    |             |             |                                                                                    |
| Thermal correction to Gibbs Free Energy=     | 0.215844                    |             |             |                                                                                    |
| Sum of electronic and zero-point Energies=   | -931.131154                 |             |             |                                                                                    |
| Sum of electronic and thermal Energies=      | -931.113992                 |             |             |                                                                                    |
| Sum of electronic and thermal Enthalpies=    | -931.113048                 |             |             |                                                                                    |
| Sum of electronic and thermal Free Energies= | -931.175813                 |             |             |                                                                                    |
| HF=-931.3916574 (Hartree/Particle)           |                             |             |             |                                                                                    |
| Compound C3                                  |                             |             |             |                                                                                    |
| 0 1                                          |                             |             |             |                                                                                    |
| O                                            | -0.44255000                 | 3.81780200  | -0.36741000 |                                                                                    |

|                                              |                             |             |             |
|----------------------------------------------|-----------------------------|-------------|-------------|
| C                                            | 0.55769700                  | -0.17784400 | -0.16210400 |
| C                                            | -0.76194100                 | 0.26172700  | -0.21913100 |
| C                                            | 1.52201400                  | 0.83397200  | -0.16741500 |
| C                                            | 0.84355000                  | -1.53939400 | -0.10268900 |
| C                                            | -1.22109400                 | 1.54604000  | -0.28172600 |
| C                                            | -0.24104800                 | 2.62686400  | -0.30231400 |
| C                                            | 2.18879600                  | -1.91661400 | -0.05301200 |
| C                                            | -1.58425800                 | -1.95180000 | -0.16007200 |
| H                                            | 2.45725700                  | -2.96078600 | -0.01531200 |
| H                                            | -2.44083800                 | -2.60402900 | -0.16319900 |
| C                                            | -0.31478800                 | -2.41813400 | -0.10343400 |
| H                                            | -0.17029800                 | -3.48809000 | -0.05938900 |
| C                                            | 2.85450600                  | 0.45088800  | -0.10267500 |
| O                                            | 3.81679600                  | 1.41794000  | -0.14358500 |
| C                                            | 4.52817000                  | 1.59869900  | 1.08894700  |
| H                                            | 3.82699100                  | 1.83852500  | 1.88981300  |
| H                                            | 5.09090100                  | 0.70132600  | 1.33455600  |
| H                                            | 5.20499600                  | 2.43186600  | 0.92654600  |
| N                                            | 1.09199500                  | 2.14420000  | -0.23600300 |
| H                                            | 1.79618000                  | 2.86564300  | -0.28412300 |
| N                                            | -1.83465500                 | -0.57964500 | -0.21968300 |
| C                                            | -2.95384400                 | 0.26125300  | -0.28535700 |
| N                                            | -2.59566700                 | 1.52092400  | -0.32171100 |
| C                                            | -4.36846300                 | -0.22349200 | -0.29282500 |
| H                                            | -4.95486500                 | 0.69625100  | -0.31336200 |
| C                                            | -4.73039600                 | -0.98406800 | 0.99223000  |
| H                                            | -4.21337000                 | -1.94659600 | 1.01864200  |
| H                                            | -5.79733900                 | -1.21325000 | 0.94984300  |
| C                                            | -4.41514600                 | -0.19049800 | 2.25645300  |
| H                                            | -4.75631100                 | -0.71978200 | 3.14552000  |
| H                                            | -3.34273800                 | -0.01752600 | 2.35471700  |
| H                                            | -4.90213000                 | 0.78491500  | 2.22890200  |
| C                                            | -4.69267200                 | -1.03629200 | -1.55093200 |
| H                                            | -4.47531500                 | -0.46002600 | -2.44920700 |
| H                                            | -4.11710700                 | -1.96179300 | -1.59441700 |
| H                                            | -5.74991100                 | -1.30242700 | -1.55784500 |
| C                                            | 3.17266200                  | -0.92437800 | -0.06138700 |
| O                                            | 4.50309500                  | -1.18842400 | -0.03202600 |
| C                                            | 4.91351200                  | -2.54623800 | -0.06183800 |
| H                                            | 4.54840500                  | -3.04017100 | -0.96350600 |
| H                                            | 5.99821500                  | -2.52614800 | -0.07041200 |
| H                                            | 4.56329900                  | -3.07893700 | 0.82387800  |
| <b>Thermochemistry</b>                       |                             |             |             |
| Zero-point correction=                       | 0.353912 (Hartree/Particle) |             |             |
| Thermal correction to Energy=                | 0.375392                    |             |             |
| Thermal correction to Enthalpy=              | 0.376336                    |             |             |
| Thermal correction to Gibbs Free Energy=     | 0.303763                    |             |             |
| Sum of electronic and zero-point Energies=   | -1087.117342                |             |             |
| Sum of electronic and thermal Energies=      | -1087.095862                |             |             |
| Sum of electronic and thermal Enthalpies=    | -1087.094917                |             |             |
| Sum of electronic and thermal Free Energies= | -1087.167490                |             |             |

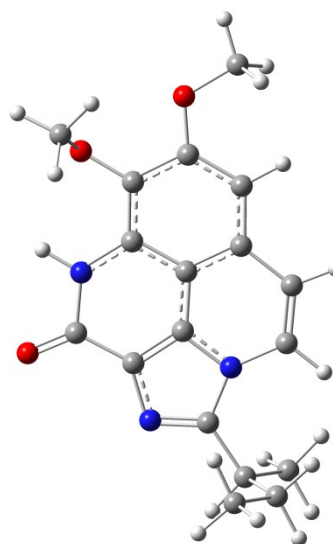

HF=-1087.4712538 (Hartree/Particle)

**Table S2:** Cartesian coordinates, and thermochemical properties for TSs of **HAT** reactions between three aaptamines derivatives with HOO radical. All calculations were performed in the gas phase and in water at the M05-2X/6-311++G(d,p) level of theory.

| Compound C1 + HOO in the gas phase       |                             |             |             |
|------------------------------------------|-----------------------------|-------------|-------------|
| 0 2                                      |                             |             |             |
| C                                        | -0.69116800                 | 0.73100200  | -0.10839200 |
| C                                        | 0.50753300                  | 1.45568300  | -0.10211500 |
| C                                        | -0.66093300                 | -0.66615000 | -0.33095200 |
| C                                        | -1.90559700                 | 1.42852100  | 0.12120300  |
| C                                        | 1.71797600                  | 0.73219900  | -0.32791300 |
| C                                        | 1.62521000                  | -0.65821000 | -0.57892500 |
| C                                        | -3.15847300                 | 0.70423600  | 0.12238300  |
| C                                        | -0.55450600                 | 3.41420700  | 0.32685200  |
| C                                        | -3.18396100                 | -0.63093200 | -0.08105300 |
| H                                        | -4.06357900                 | 1.26870200  | 0.29285700  |
| H                                        | -0.49202600                 | 4.48170900  | 0.50220100  |
| O                                        | -4.27515600                 | -1.39644600 | -0.09931700 |
| C                                        | -5.52721400                 | -0.76174400 | 0.10922600  |
| H                                        | -6.27102400                 | -1.54865900 | 0.05347300  |
| H                                        | -5.55760400                 | -0.28969700 | 1.09279900  |
| H                                        | -5.71306500                 | -0.01796100 | -0.66758800 |
| C                                        | -1.92959700                 | -1.43752300 | -0.31237800 |
| O                                        | -1.99404300                 | -2.63124600 | -0.46525900 |
| N                                        | 0.46009800                  | -1.31976900 | -0.55849300 |
| C                                        | -1.81692900                 | 2.78652500  | 0.33691100  |
| H                                        | -2.70425000                 | 3.37779500  | 0.51760000  |
| N                                        | 0.58058100                  | 2.78857600  | 0.11867800  |
| C                                        | 2.85090100                  | -1.40915200 | -0.83562600 |
| H                                        | 2.67721000                  | -2.31180800 | -1.41444700 |
| H                                        | 3.14824000                  | -1.86134300 | 0.31294900  |
| N                                        | 2.89517300                  | 1.37165900  | -0.31336900 |
| H                                        | 2.86135300                  | 2.34337000  | -0.04541400 |
| C                                        | 4.15519900                  | 0.64019300  | -0.31124800 |
| H                                        | 4.94030300                  | 1.31583100  | -0.64363800 |
| H                                        | 4.38535300                  | 0.29943900  | 0.70129700  |
| C                                        | 4.04057600                  | -0.56204600 | -1.24202700 |
| H                                        | 4.95901100                  | -1.14540500 | -1.19297900 |
| H                                        | 3.91734200                  | -0.21568500 | -2.27242200 |
| O                                        | 3.33302500                  | -2.06661200 | 1.56042300  |
| O                                        | 2.42718700                  | -1.21115100 | 2.14274700  |
| H                                        | 1.61956000                  | -1.73676500 | 2.21114700  |
| <b>Thermochemistry</b>                   |                             |             |             |
| Zero-point correction=                   | 0.276082 (Hartree/Particle) |             |             |
| Thermal correction to Energy=            | 0.294531                    |             |             |
| Thermal correction to Enthalpy=          | 0.295475                    |             |             |
| Thermal correction to Gibbs Free Energy= | 0.228025                    |             |             |

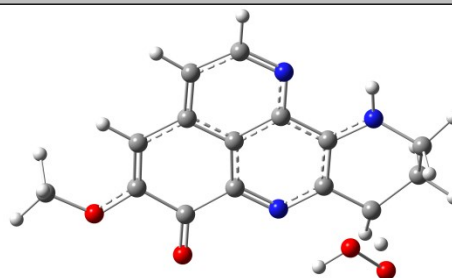

Sum of electronic and zero-point Energies= -1044.902145  
 Sum of electronic and thermal Energies= -1044.883696  
 Sum of electronic and thermal Enthalpies= -1044.882752  
 Sum of electronic and thermal Free Energies= -1044.950201

HF=-1045.1782264 (Hartree/Particle)

**Compound C1 + HOO in WATER**

|     |             |             |             |
|-----|-------------|-------------|-------------|
| 0 2 |             |             |             |
| C   | -0.69930200 | 0.72621200  | -0.10746300 |
| C   | 0.49634400  | 1.45144600  | -0.10732200 |
| C   | -0.67760800 | -0.66952100 | -0.32781800 |
| C   | -1.91432100 | 1.42143400  | 0.12115700  |
| C   | 1.71219800  | 0.72232800  | -0.32666200 |
| C   | 1.61460700  | -0.68474100 | -0.56376100 |
| C   | -3.16312700 | 0.69539900  | 0.13079400  |
| C   | -0.57723600 | 3.41286700  | 0.30602000  |
| C   | -3.17795000 | -0.63854200 | -0.07542400 |
| H   | -4.07004900 | 1.25474700  | 0.30893300  |
| H   | -0.52181400 | 4.48122200  | 0.46994100  |
| O   | -4.27388400 | -1.41717000 | -0.08690400 |
| C   | -5.53229200 | -0.77205400 | 0.14558800  |
| H   | -6.27813800 | -1.55789900 | 0.09901200  |
| H   | -5.53707200 | -0.30548500 | 1.13007000  |
| H   | -5.72003800 | -0.02792100 | -0.62767000 |
| C   | -1.93350900 | -1.42065300 | -0.32137600 |
| O   | -2.00035600 | -2.63385000 | -0.50427600 |
| N   | 0.45156700  | -1.33260300 | -0.55303900 |
| C   | -1.83450200 | 2.78108600  | 0.32719300  |
| H   | -2.72482600 | 3.36778000  | 0.50650400  |
| N   | 0.56259000  | 2.78552800  | 0.09864300  |
| C   | 2.84495900  | -1.43370100 | -0.80808200 |
| H   | 2.67660600  | -2.35639000 | -1.35691700 |
| H   | 3.15520400  | -1.83508200 | 0.32555900  |
| N   | 2.88235700  | 1.34519700  | -0.32105900 |
| H   | 2.87470400  | 2.33313500  | -0.10988700 |
| C   | 4.15849800  | 0.63918600  | -0.41008400 |
| H   | 4.89058200  | 1.32786900  | -0.82167800 |
| H   | 4.47867200  | 0.35247200  | 0.59316200  |
| C   | 4.00902100  | -0.59113000 | -1.28774800 |
| H   | 4.93358100  | -1.16443700 | -1.26108700 |
| H   | 3.83180500  | -0.28682700 | -2.32298900 |
| O   | 3.34166900  | -2.05369600 | 1.62593300  |
| O   | 2.56833200  | -1.08501100 | 2.21621200  |
| H   | 1.69443300  | -1.48991700 | 2.31744500  |

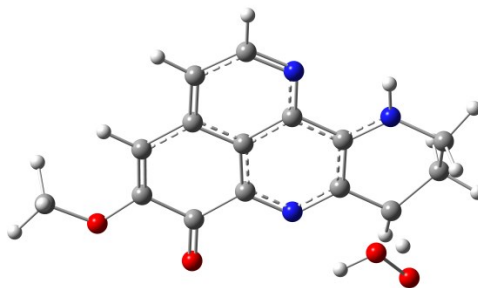

Thermochemistry

Zero-point correction= 0.275373 (Hartree/Particle)  
 Thermal correction to Energy= 0.293809  
 Thermal correction to Enthalpy= 0.294754  
 Thermal correction to Gibbs Free Energy= 0.227777



Sum of electronic and zero-point Energies= -1044.946300  
 Sum of electronic and thermal Energies= -1044.927863  
 Sum of electronic and thermal Enthalpies= -1044.926919  
 Sum of electronic and thermal Free Energies= -1044.993896

HF=-1045.2216729 (Hartree/Particle)

**Compound C2 + HOO in the gas phase**

|     |             |             |             |
|-----|-------------|-------------|-------------|
| 0 2 |             |             |             |
| O   | -3.45968000 | -0.62574200 | -0.76549200 |
| N   | 1.51787100  | 3.20108000  | 0.39050900  |
| N   | 1.23161300  | -0.91078700 | -0.43929300 |
| C   | 0.16212600  | 1.26987700  | -0.10101500 |
| C   | -1.02872100 | 2.02989800  | -0.01736500 |
| C   | 0.11124000  | -0.11764800 | -0.37493700 |
| C   | 1.39486800  | 1.91306600  | 0.11600100  |
| C   | -1.14014900 | -0.73618000 | -0.59562400 |
| C   | -2.29307700 | 1.40154700  | -0.22984500 |
| C   | -2.34881000 | 0.07285200  | -0.52252100 |
| C   | -0.87904400 | 3.38787700  | 0.27339000  |
| C   | 2.63192100  | 1.09324500  | 0.03502600  |
| C   | 0.39070500  | 3.91337500  | 0.46239900  |
| C   | 2.38726100  | -0.37416700 | -0.25839500 |
| C   | -4.70362400 | -0.02909500 | -0.42410600 |
| H   | -3.18876500 | 1.99954400  | -0.16099900 |
| H   | -1.74659300 | 4.02899400  | 0.35133000  |
| H   | 0.51159400  | 4.96575300  | 0.68609100  |
| H   | -5.45046800 | -0.80042800 | -0.57465800 |
| H   | -4.91495900 | 0.82241400  | -1.07259500 |
| H   | -4.69014100 | 0.27935000  | 0.62171900  |
| O   | 3.74670300  | 1.51542300  | 0.18895600  |
| O   | 3.50321200  | -1.07109600 | -0.31683700 |
| C   | 3.41618100  | -2.48714200 | -0.58888200 |
| H   | 4.40630800  | -2.73943200 | -0.95603100 |
| H   | 2.68083500  | -2.64543500 | -1.37454400 |
| C   | 3.07867100  | -3.26172200 | 0.66840300  |
| H   | 2.08454700  | -3.00520500 | 1.02799000  |
| H   | 3.10454300  | -4.33001600 | 0.45295200  |
| H   | 3.80815400  | -3.04793400 | 1.44798800  |
| N   | -1.26018800 | -2.03369500 | -0.88095500 |
| H   | -0.35292200 | -2.48892300 | -0.84143400 |
| H   | -2.04202900 | -2.55745000 | -0.18442800 |
| O   | -2.49444800 | -2.92667600 | 0.96470800  |
| O   | -2.52707500 | -1.74804300 | 1.68603500  |
| H   | -1.86217400 | -1.88303500 | 2.37065400  |

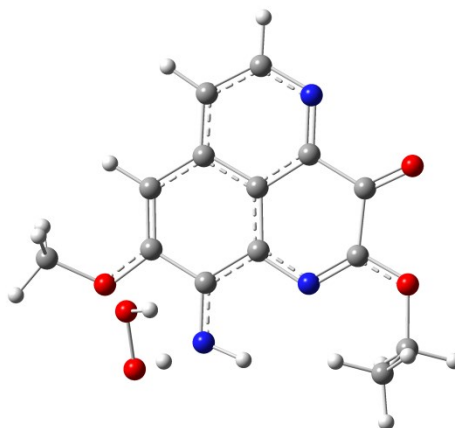

Thermochemistry

Zero-point correction= 0.272857 (Hartree/Particle)  
 Thermal correction to Energy= 0.292706  
 Thermal correction to Enthalpy= 0.293650  
 Thermal correction to Gibbs Free Energy= 0.223231

Sum of electronic and zero-point Energies= -1082.025020  
 Sum of electronic and thermal Energies= -1082.005170  
 Sum of electronic and thermal Enthalpies= -1082.004226  
 Sum of electronic and thermal Free Energies= -1082.074646

HF=-1082.2978766 (Hartree/Particle)

**Compound C2 + HOO in WATER**

|     |             |             |             |
|-----|-------------|-------------|-------------|
| 0 2 |             |             |             |
| O   | -3.48143400 | -0.73169400 | -0.68915500 |
| N   | 1.40359900  | 3.24221000  | 0.39122300  |
| N   | 1.22859300  | -0.86970300 | -0.45964700 |
| C   | 0.10102100  | 1.26886700  | -0.08077600 |
| C   | -1.11068300 | 1.99233600  | 0.01994500  |
| C   | 0.09042800  | -0.11600100 | -0.36331200 |
| C   | 1.31417500  | 1.94489000  | 0.11558100  |
| C   | -1.14979800 | -0.76734000 | -0.56994100 |
| C   | -2.36243100 | 1.33057900  | -0.17486100 |
| C   | -2.38149300 | 0.00199600  | -0.46321200 |
| C   | -1.00161800 | 3.35137200  | 0.30924100  |
| C   | 2.55833000  | 1.16498300  | 0.01069800  |
| C   | 0.25479100  | 3.91829300  | 0.48147100  |
| C   | 2.36864400  | -0.29646000 | -0.28918800 |
| C   | -4.75106700 | -0.07873400 | -0.54871000 |
| H   | -3.27002800 | 1.90917200  | -0.09432300 |
| H   | -1.88702200 | 3.96501100  | 0.40014800  |
| H   | 0.33732100  | 4.97310300  | 0.70550000  |
| H   | -5.49454300 | -0.84423000 | -0.74061100 |
| H   | -4.84172000 | 0.72513800  | -1.27802200 |
| H   | -4.86019000 | 0.30879800  | 0.46336200  |
| O   | 3.67392600  | 1.62849100  | 0.15214400  |
| O   | 3.51288400  | -0.94787200 | -0.36987200 |
| C   | 3.48526000  | -2.38165300 | -0.63120100 |
| H   | 4.47792600  | -2.58746500 | -1.01795400 |
| H   | 2.74385900  | -2.57501300 | -1.40114400 |
| C   | 3.21525800  | -3.15196000 | 0.63984800  |
| H   | 2.22486600  | -2.93383400 | 1.03463200  |
| H   | 3.27371700  | -4.21824000 | 0.42008200  |
| H   | 3.96417400  | -2.91294500 | 1.39396400  |
| N   | -1.22118400 | -2.05677200 | -0.90556500 |
| H   | -0.30311200 | -2.49392900 | -0.90632100 |
| H   | -1.93533500 | -2.61821100 | -0.26313300 |
| O   | -2.33267200 | -3.04475700 | 1.01591000  |
| O   | -2.21202400 | -1.90218500 | 1.77977000  |
| H   | -1.37730700 | -2.01036500 | 2.25786800  |

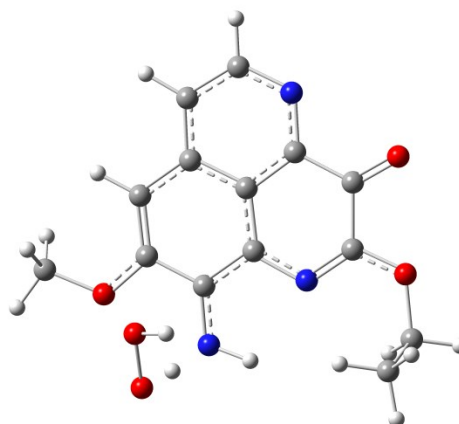

Thermochemistry

Zero-point correction= 0.271787 (Hartree/Particle)  
 Thermal correction to Energy= 0.291840  
 Thermal correction to Enthalpy= 0.292784  
 Thermal correction to Gibbs Free Energy= 0.221711

Sum of electronic and zero-point Energies= -1082.064630  
 Sum of electronic and thermal Energies= -1082.044577  
 Sum of electronic and thermal Enthalpies= -1082.043633  
 Sum of electronic and thermal Free Energies= -1082.114706

HF=-1082.3364166 (Hartree/Particle)

**Compound C3 + HOO in the gas phase**

|     |             |             |             |
|-----|-------------|-------------|-------------|
| 0 2 |             |             |             |
| O   | -0.27287900 | 3.65403600  | -0.51026200 |
| C   | 1.02235000  | -0.24895600 | -0.20192200 |
| C   | -0.32469200 | 0.08408800  | -0.30182300 |
| C   | 1.90799000  | 0.83321900  | -0.20277600 |
| C   | 1.41078500  | -1.58340400 | -0.11603100 |
| C   | -0.86758800 | 1.33229400  | -0.42659500 |
| C   | 0.02855600  | 2.48541400  | -0.42663800 |
| C   | 2.77845900  | -1.85617900 | -0.02526600 |
| C   | -0.97651100 | -2.18113100 | -0.24431500 |
| H   | 3.12493700  | -2.87609000 | 0.03334600  |
| H   | -1.77567700 | -2.89970800 | -0.27121900 |
| C   | 0.32309500  | -2.54561600 | -0.14646000 |
| H   | 0.54607800  | -3.60167600 | -0.09464200 |
| C   | 3.26271700  | 0.55496400  | -0.09501800 |
| O   | 4.14673100  | 1.59272500  | -0.12942300 |
| C   | 4.82665500  | 1.83983500  | 1.11064100  |
| H   | 4.09816600  | 2.02414500  | 1.90156700  |
| H   | 5.46023700  | 0.99477600  | 1.36785900  |
| H   | 5.43186400  | 2.72638900  | 0.94925400  |
| N   | 1.38664200  | 2.10843700  | -0.31094500 |
| H   | 2.03890500  | 2.87827300  | -0.34415700 |
| N   | -1.33462300 | -0.83067500 | -0.31060900 |
| C   | -2.50991200 | -0.07651500 | -0.44931900 |
| N   | -2.22544200 | 1.21327600  | -0.51934400 |
| C   | -3.89242300 | -0.58022000 | -0.51655000 |
| H   | -4.47677900 | 0.25631600  | 0.29804200  |
| C   | -4.22493200 | -1.93473500 | 0.07514200  |
| H   | -3.79960200 | -2.73638000 | -0.53980700 |
| H   | -5.30644700 | -2.05605200 | -0.01037700 |
| C   | -3.82829900 | -2.07616300 | 1.54552800  |
| H   | -4.12167900 | -3.05219800 | 1.93093500  |
| H   | -2.75602100 | -1.95978100 | 1.70082100  |
| H   | -4.32751100 | -1.30689200 | 2.13366900  |
| C   | -4.59185400 | -0.24564300 | -1.82114900 |
| H   | -4.38420200 | 0.78270000  | -2.10904300 |
| H   | -4.24248400 | -0.90836300 | -2.61905700 |
| H   | -5.66872200 | -0.37627000 | -1.71524800 |
| C   | 3.68389200  | -0.79203000 | -0.02245000 |
| O   | 5.02768900  | -0.95243500 | 0.04441300  |
| C   | 5.54304400  | -2.27528100 | 0.05151200  |
| H   | 5.24328800  | -2.81051900 | -0.85051500 |
| H   | 6.62255600  | -2.17032100 | 0.07198700  |

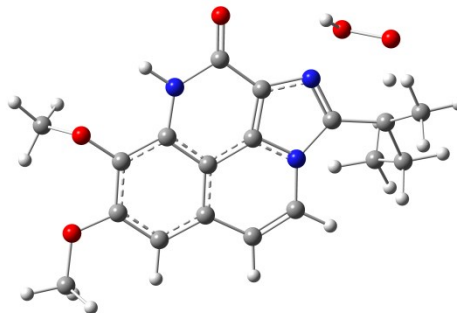

|                                              |             |             |                             |  |
|----------------------------------------------|-------------|-------------|-----------------------------|--|
| H                                            | 5.20971100  | -2.81794800 | 0.93749400                  |  |
| O                                            | -4.95929600 | 1.12277500  | 1.00249400                  |  |
| O                                            | -3.90733600 | 1.57466100  | 1.76179400                  |  |
| H                                            | -3.40993100 | 2.13460800  | 1.14417300                  |  |
| <b>Thermochemistry</b>                       |             |             |                             |  |
| Zero-point correction=                       |             |             | 0.365074 (Hartree/Particle) |  |
| Thermal correction to Energy=                |             |             | 0.389569                    |  |
| Thermal correction to Enthalpy=              |             |             | 0.390513                    |  |
| Thermal correction to Gibbs Free Energy=     |             |             | 0.310311                    |  |
| Sum of electronic and zero-point Energies=   |             |             | -1238.010903                |  |
| Sum of electronic and thermal Energies=      |             |             | -1237.986408                |  |
| Sum of electronic and thermal Enthalpies=    |             |             | -1237.985464                |  |
| Sum of electronic and thermal Free Energies= |             |             | -1238.065666                |  |
| HF=-1238.3759775 (Hartree/Particle)          |             |             |                             |  |
| <b>Compound C3 + HOO in WATER</b>            |             |             |                             |  |
| 0 2                                          |             |             |                             |  |
| O                                            | -0.42187000 | 3.56035900  | -0.34279200                 |  |
| C                                            | 1.08201300  | -0.27671100 | -0.15463100                 |  |
| C                                            | -0.27758400 | -0.00778300 | -0.19606300                 |  |
| C                                            | 1.91356000  | 0.84510700  | -0.18007000                 |  |
| C                                            | 1.52785700  | -1.59744300 | -0.09886700                 |  |
| C                                            | -0.87891800 | 1.21601000  | -0.26285700                 |  |
| C                                            | -0.03783700 | 2.38715500  | -0.28802400                 |  |
| C                                            | 2.90656000  | -1.81101100 | -0.06516700                 |  |
| C                                            | -0.83324400 | -2.30627000 | -0.13169000                 |  |
| H                                            | 3.29990700  | -2.81516800 | -0.02579600                 |  |
| H                                            | -1.61346300 | -3.04999000 | -0.13398500                 |  |
| C                                            | 0.48366100  | -2.61082700 | -0.08978400                 |  |
| H                                            | 0.76133000  | -3.65439300 | -0.05197300                 |  |
| C                                            | 3.28092800  | 0.62232800  | -0.14356600                 |  |
| O                                            | 4.15065000  | 1.68160500  | -0.20361700                 |  |
| C                                            | 4.62355200  | 2.09523700  | 1.09808900                  |  |
| H                                            | 3.78039700  | 2.41746900  | 1.70837300                  |  |
| H                                            | 5.14893400  | 1.27373100  | 1.58143800                  |  |
| H                                            | 5.30138800  | 2.92560200  | 0.92634100                  |  |
| N                                            | 1.32258400  | 2.09975200  | -0.24493800                 |  |
| H                                            | 1.93490500  | 2.90632600  | -0.25700900                 |  |
| N                                            | -1.23932000 | -0.96516600 | -0.18301700                 |  |
| C                                            | -2.44895700 | -0.27513300 | -0.24209400                 |  |
| N                                            | -2.24465500 | 1.02679600  | -0.29381700                 |  |
| C                                            | -3.77591600 | -0.94953900 | -0.26292700                 |  |
| H                                            | -4.56787100 | 0.05847000  | -0.32353200                 |  |
| C                                            | -4.15403800 | -1.69334200 | 1.00412200                  |  |
| H                                            | -3.56592400 | -2.61683600 | 1.04668500                  |  |
| H                                            | -5.19769400 | -1.99695100 | 0.90742700                  |  |
| C                                            | -3.94798100 | -0.88256900 | 2.27824600                  |  |
| H                                            | -4.24402900 | -1.46623300 | 3.14928900                  |  |
| H                                            | -2.90122800 | -0.60022000 | 2.40301100                  |  |
| H                                            | -4.54607000 | 0.02842400  | 2.25835600                  |  |

|                                              |             |                             |             |  |
|----------------------------------------------|-------------|-----------------------------|-------------|--|
| C                                            | -4.07577000 | -1.67379600                 | -1.55759300 |  |
| H                                            | -3.90210500 | -1.02798700                 | -2.41779400 |  |
| H                                            | -3.43001900 | -2.55211500                 | -1.65155800 |  |
| H                                            | -5.11138800 | -2.01255500                 | -1.56237600 |  |
| C                                            | 3.76177300  | -0.70441100                 | -0.08953500 |  |
| O                                            | 5.11356600  | -0.80400300                 | -0.07129900 |  |
| C                                            | 5.68556400  | -2.11584300                 | -0.00004900 |  |
| H                                            | 5.40349600  | -2.70136700                 | -0.87414200 |  |
| H                                            | 6.75940800  | -1.96296000                 | 0.01287400  |  |
| H                                            | 5.36962800  | -2.61863200                 | 0.91311400  |  |
| O                                            | -5.20108200 | 1.10885700                  | -0.55022800 |  |
| O                                            | -4.73782600 | 2.03535900                  | 0.36910900  |  |
| H                                            | -3.78870100 | 2.11135100                  | 0.12903200  |  |
| <u>Thermochemistry</u>                       |             |                             |             |  |
| Zero-point correction=                       |             | 0.363780 (Hartree/Particle) |             |  |
| Thermal correction to Energy=                |             | 0.388226                    |             |  |
| Thermal correction to Enthalpy=              |             | 0.389170                    |             |  |
| Thermal correction to Gibbs Free Energy=     |             | 0.309512                    |             |  |
| Sum of electronic and zero-point Energies=   |             | -1238.050826                |             |  |
| Sum of electronic and thermal Energies=      |             | -1238.026380                |             |  |
| Sum of electronic and thermal Enthalpies=    |             | -1238.025436                |             |  |
| Sum of electronic and thermal Free Energies= |             | -1238.105095                |             |  |
| HF=-1238.4146061 (Hartree/Particle)          |             |                             |             |  |
|                                              |             |                             |             |  |

**Table S3:** Cartesian coordinates, and thermochemical properties for TSs of **RAF reactions** between three aaptamines derivatives with HOO radical. All calculations were performed in the gas phase and in water at the M05-2X/6-311++G(d,p) level of theory.

| Compound C1 + HOO in the gas phase       |             |             |                             | RAF reaction                                                                       |
|------------------------------------------|-------------|-------------|-----------------------------|------------------------------------------------------------------------------------|
| 0                                        | 2           |             |                             | 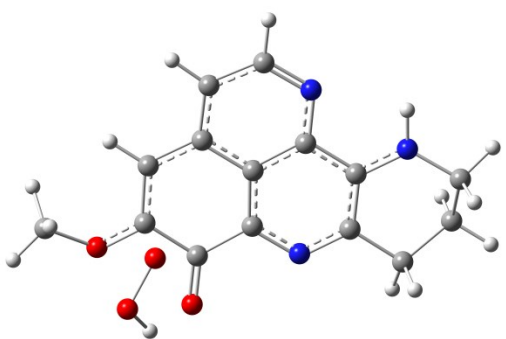 |
| C                                        | 0.10913800  | 0.71320200  | -0.14913000                 |                                                                                    |
| C                                        | 1.41673200  | 1.19063600  | 0.03342400                  |                                                                                    |
| C                                        | -0.10120900 | -0.67167500 | -0.28492100                 |                                                                                    |
| C                                        | -0.95524500 | 1.66676700  | -0.19875200                 |                                                                                    |
| C                                        | 2.47332700  | 0.23488300  | 0.07218000                  |                                                                                    |
| C                                        | 2.14117800  | -1.12481600 | -0.07987900                 |                                                                                    |
| C                                        | -2.28443600 | 1.22484800  | -0.42028800                 |                                                                                    |
| C                                        | 0.73417600  | 3.36209800  | 0.12700800                  |                                                                                    |
| C                                        | -2.57541800 | -0.14783700 | -0.42061100                 |                                                                                    |
| H                                        | -3.07702300 | 1.95182600  | -0.50887700                 |                                                                                    |
| H                                        | 0.99477000  | 4.40745300  | 0.24194200                  |                                                                                    |
| O                                        | -3.74151400 | -0.64508600 | -0.82196800                 |                                                                                    |
| C                                        | -4.90594800 | 0.13805900  | -0.55808300                 |                                                                                    |
| H                                        | -5.74767300 | -0.52997900 | -0.70247000                 |                                                                                    |
| H                                        | -4.88164300 | 0.49300000  | 0.47132700                  |                                                                                    |
| H                                        | -4.97399800 | 0.97079300  | -1.25887100                 |                                                                                    |
| C                                        | -1.47457200 | -1.18704100 | -0.44478500                 |                                                                                    |
| O                                        | -1.77007500 | -2.35884100 | -0.50238600                 |                                                                                    |
| N                                        | 0.89467400  | -1.54468400 | -0.25651400                 |                                                                                    |
| C                                        | -0.61189800 | 3.00410300  | -0.06016800                 |                                                                                    |
| H                                        | -1.37199100 | 3.77231400  | -0.09131900                 |                                                                                    |
| N                                        | 1.72807700  | 2.50269900  | 0.17540700                  |                                                                                    |
| C                                        | 3.24506600  | -2.14916100 | -0.04816100                 |                                                                                    |
| H                                        | 2.96341000  | -2.97308900 | -0.70133200                 |                                                                                    |
| H                                        | 3.33027400  | -2.55456900 | 0.96398100                  |                                                                                    |
| N                                        | 3.74509800  | 0.64975500  | 0.23868800                  |                                                                                    |
| H                                        | 3.87180900  | 1.63798100  | 0.38683100                  |                                                                                    |
| C                                        | 4.85449900  | -0.28016300 | 0.36602800                  |                                                                                    |
| H                                        | 5.75912900  | 0.22106300  | 0.02595700                  |                                                                                    |
| H                                        | 4.99677500  | -0.56306700 | 1.41381400                  |                                                                                    |
| C                                        | 4.57466500  | -1.52389000 | -0.46983800                 |                                                                                    |
| H                                        | 5.38997900  | -2.23550600 | -0.34660400                 |                                                                                    |
| H                                        | 4.53114900  | -1.23990000 | -1.52297000                 |                                                                                    |
| O                                        | -2.64441900 | -0.41602200 | 1.48867900                  |                                                                                    |
| O                                        | -3.49219100 | -1.46575700 | 1.64490000                  |                                                                                    |
| H                                        | -3.01463600 | -2.22714500 | 1.26758800                  |                                                                                    |
| <u>Thermochemistry</u>                   |             |             |                             |                                                                                    |
| Zero-point correction=                   |             |             | 0.280650 (Hartree/Particle) |                                                                                    |
| Thermal correction to Energy=            |             |             | 0.298568                    |                                                                                    |
| Thermal correction to Enthalpy=          |             |             | 0.299512                    |                                                                                    |
| Thermal correction to Gibbs Free Energy= |             |             | 0.234739                    |                                                                                    |

Sum of electronic and zero-point Energies= -1044.907342  
 Sum of electronic and thermal Energies= -1044.889424  
 Sum of electronic and thermal Enthalpies= -1044.888480  
 Sum of electronic and thermal Free Energies= -1044.953254

HF=-1045.1879922 (Hartree/Particle)

| Compound C1 + HOO in WATER               |                             |             |             | RAF reaction                                                                       |
|------------------------------------------|-----------------------------|-------------|-------------|------------------------------------------------------------------------------------|
| 0 2                                      |                             |             |             | 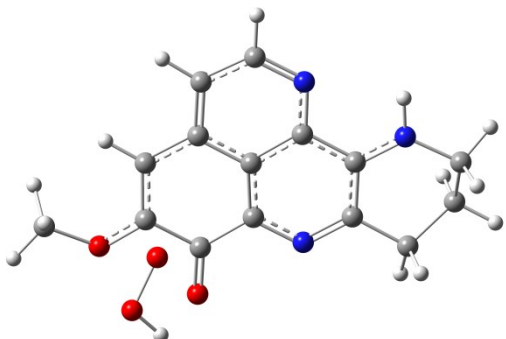 |
| C                                        | 0.09434800                  | 0.70787600  | -0.15102600 |                                                                                    |
| C                                        | 1.39361000                  | 1.19980300  | 0.04191200  |                                                                                    |
| C                                        | -0.10787500                 | -0.67435700 | -0.29546500 |                                                                                    |
| C                                        | -0.97980600                 | 1.64978000  | -0.21204000 |                                                                                    |
| C                                        | 2.46291100                  | 0.25189000  | 0.09205000  |                                                                                    |
| C                                        | 2.14132100                  | -1.12582600 | -0.06907800 |                                                                                    |
| C                                        | -2.30534300                 | 1.19492900  | -0.42603400 |                                                                                    |
| C                                        | 0.67871400                  | 3.36825900  | 0.11495200  |                                                                                    |
| C                                        | -2.57143100                 | -0.18188700 | -0.42362700 |                                                                                    |
| H                                        | -3.10486100                 | 1.91472400  | -0.51279200 |                                                                                    |
| H                                        | 0.92165500                  | 4.41732300  | 0.22229200  |                                                                                    |
| O                                        | -3.74317700                 | -0.70356300 | -0.76872600 |                                                                                    |
| C                                        | -4.90736100                 | 0.13484300  | -0.63784300 |                                                                                    |
| H                                        | -5.75617400                 | -0.52725300 | -0.76644000 |                                                                                    |
| H                                        | -4.92383900                 | 0.58685900  | 0.35222700  |                                                                                    |
| H                                        | -4.90568000                 | 0.89812200  | -1.41345600 |                                                                                    |
| C                                        | -1.45589600                 | -1.18969400 | -0.49258000 |                                                                                    |
| O                                        | -1.73312400                 | -2.37177400 | -0.65912500 |                                                                                    |
| N                                        | 0.90657100                  | -1.54722300 | -0.26229200 |                                                                                    |
| C                                        | -0.66040400                 | 2.99182800  | -0.08067500 |                                                                                    |
| H                                        | -1.43200500                 | 3.74750900  | -0.12584700 |                                                                                    |
| N                                        | 1.68287400                  | 2.51725700  | 0.17815200  |                                                                                    |
| C                                        | 3.26127900                  | -2.12643400 | -0.01545500 |                                                                                    |
| H                                        | 2.99108300                  | -2.98917500 | -0.62146700 |                                                                                    |
| H                                        | 3.38324600                  | -2.46935800 | 1.01598700  |                                                                                    |
| N                                        | 3.71846200                  | 0.65857500  | 0.27863100  |                                                                                    |
| H                                        | 3.86546600                  | 1.64949300  | 0.39913800  |                                                                                    |
| C                                        | 4.86161900                  | -0.24993600 | 0.32481600  |                                                                                    |
| H                                        | 5.72358700                  | 0.28502200  | -0.06557800 |                                                                                    |
| H                                        | 5.06946200                  | -0.52360500 | 1.36098300  |                                                                                    |
| C                                        | 4.56540900                  | -1.49306000 | -0.49464300 |                                                                                    |
| H                                        | 5.39085200                  | -2.19453200 | -0.38990100 |                                                                                    |
| H                                        | 4.48009700                  | -1.22129700 | -1.54848200 |                                                                                    |
| O                                        | -2.57828200                 | -0.40395400 | 1.55064000  |                                                                                    |
| O                                        | -3.42124200                 | -1.45454300 | 1.80043000  |                                                                                    |
| H                                        | -2.87820200                 | -2.25149400 | 1.69455100  |                                                                                    |
| <u>Thermochemistry</u>                   |                             |             |             |                                                                                    |
| Zero-point correction=                   | 0.280097 (Hartree/Particle) |             |             |                                                                                    |
| Thermal correction to Energy=            | 0.298187                    |             |             |                                                                                    |
| Thermal correction to Enthalpy=          | 0.299131                    |             |             |                                                                                    |
| Thermal correction to Gibbs Free Energy= | 0.233816                    |             |             |                                                                                    |

Sum of electronic and zero-point Energies= -1044.948341  
 Sum of electronic and thermal Energies= -1044.930251  
 Sum of electronic and thermal Enthalpies= -1044.929307  
 Sum of electronic and thermal Free Energies= -1044.994622

HF=-1045.2284382 (Hartree/Particle)

| Compound C2 + HOO in the gas phase       |                             |             |             | RAF reaction                                                                        |
|------------------------------------------|-----------------------------|-------------|-------------|-------------------------------------------------------------------------------------|
| 0 2                                      |                             |             |             |                                                                                     |
| O                                        | 3.72680700                  | -1.89126500 | 0.21499800  | 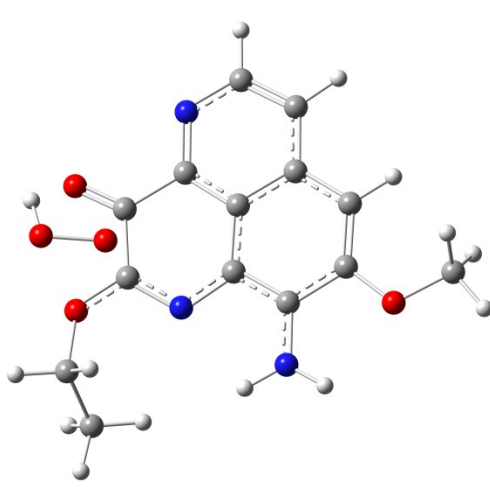 |
| N                                        | -0.16611900                 | 3.13675800  | -0.45715800 |                                                                                     |
| N                                        | -0.84532200                 | -1.02177400 | -0.26305000 |                                                                                     |
| C                                        | 0.67662700                  | 0.89680200  | -0.20516000 |                                                                                     |
| C                                        | 2.00348100                  | 1.36474000  | -0.13692400 |                                                                                     |
| C                                        | 0.39001600                  | -0.50219900 | -0.15032500 |                                                                                     |
| C                                        | -0.35796300                 | 1.83250900  | -0.35920900 |                                                                                     |
| C                                        | 1.46365300                  | -1.40358800 | -0.01200200 |                                                                                     |
| C                                        | 3.07619900                  | 0.42876800  | 0.01465000  |                                                                                     |
| C                                        | 2.80863700                  | -0.90480800 | 0.07462000  |                                                                                     |
| C                                        | 2.19314500                  | 2.74612200  | -0.22812500 |                                                                                     |
| C                                        | -1.75480200                 | 1.32016400  | -0.39460300 |                                                                                     |
| C                                        | 1.09389800                  | 3.57390100  | -0.38910600 |                                                                                     |
| C                                        | -1.87396600                 | -0.17866600 | -0.24147100 |                                                                                     |
| C                                        | 5.09201500                  | -1.50718400 | 0.31499700  |                                                                                     |
| H                                        | 4.08646400                  | 0.80354900  | 0.07718200  |                                                                                     |
| H                                        | 3.18802800                  | 3.16812800  | -0.17954700 |                                                                                     |
| H                                        | 1.22837500                  | 4.64532100  | -0.46680900 |                                                                                     |
| H                                        | 5.65415300                  | -2.42823200 | 0.42300900  |                                                                                     |
| H                                        | 5.24570000                  | -0.87374500 | 1.18938900  |                                                                                     |
| H                                        | 5.40714100                  | -0.98403000 | -0.58860000 |                                                                                     |
| O                                        | -2.73766100                 | 2.01814600  | -0.44934100 |                                                                                     |
| O                                        | -3.10142900                 | -0.61608800 | -0.46134100 |                                                                                     |
| C                                        | -3.40891000                 | -1.96153400 | -0.04092900 |                                                                                     |
| H                                        | -4.43777500                 | -1.90569800 | 0.30394300  |                                                                                     |
| H                                        | -2.76447200                 | -2.21118100 | 0.79955200  |                                                                                     |
| C                                        | -3.26322300                 | -2.93423900 | -1.19267100 |                                                                                     |
| H                                        | -2.23062800                 | -2.97403300 | -1.53311300 |                                                                                     |
| H                                        | -3.57167900                 | -3.93041100 | -0.87271300 |                                                                                     |
| H                                        | -3.89584900                 | -2.62832700 | -2.02485800 |                                                                                     |
| N                                        | 1.24785900                  | -2.72689300 | 0.03692900  |                                                                                     |
| H                                        | 0.29502100                  | -3.04883600 | 0.02174900  |                                                                                     |
| H                                        | 2.01486100                  | -3.35765200 | 0.17677900  |                                                                                     |
| O                                        | -1.88411600                 | 0.22669700  | 1.67341400  |                                                                                     |
| O                                        | -3.17510600                 | 0.51177400  | 1.96691300  |                                                                                     |
| H                                        | -3.33508500                 | 1.38967200  | 1.57737100  |                                                                                     |
| <b>Thermochemistry</b>                   |                             |             |             |                                                                                     |
| Zero-point correction=                   | 0.276791 (Hartree/Particle) |             |             |                                                                                     |
| Thermal correction to Energy=            | 0.296529                    |             |             |                                                                                     |
| Thermal correction to Enthalpy=          | 0.297473                    |             |             |                                                                                     |
| Thermal correction to Gibbs Free Energy= | 0.228689                    |             |             |                                                                                     |



Sum of electronic and zero-point Energies= -1082.035081  
 Sum of electronic and thermal Energies= -1082.015344  
 Sum of electronic and thermal Enthalpies= -1082.014400  
 Sum of electronic and thermal Free Energies= -1082.083184

HF=-1082.3118724 (Hartree/Particle)

| Compound C2 + HOO in WATER               |                             |             |             | RAF reaction                                                                       |
|------------------------------------------|-----------------------------|-------------|-------------|------------------------------------------------------------------------------------|
| 0 2                                      |                             |             |             |                                                                                    |
| O                                        | 3.77859800                  | -1.81579300 | 0.23463000  | 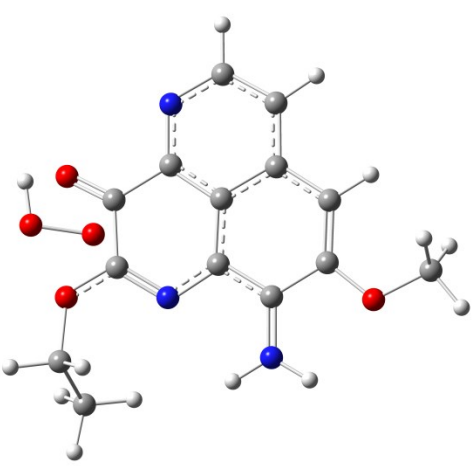 |
| N                                        | -0.25670100                 | 3.08834900  | -0.52074300 |                                                                                    |
| N                                        | -0.83653700                 | -1.06913200 | -0.20886800 |                                                                                    |
| C                                        | 0.63993700                  | 0.87333600  | -0.21738700 |                                                                                    |
| C                                        | 1.95698400                  | 1.37588900  | -0.15314900 |                                                                                    |
| C                                        | 0.38857200                  | -0.52584300 | -0.13165800 |                                                                                    |
| C                                        | -0.41699700                 | 1.77213600  | -0.39987700 |                                                                                    |
| C                                        | 1.49572800                  | -1.40512300 | 0.01052300  |                                                                                    |
| C                                        | 3.06064600                  | 0.47310000  | 0.01289300  |                                                                                    |
| C                                        | 2.83744700                  | -0.86251400 | 0.08849600  |                                                                                    |
| C                                        | 2.11299800                  | 2.75324900  | -0.26737000 |                                                                                    |
| C                                        | -1.78384500                 | 1.22081800  | -0.46735800 |                                                                                    |
| C                                        | 0.99105700                  | 3.55460200  | -0.44800300 |                                                                                    |
| C                                        | -1.87273600                 | -0.25266700 | -0.24945700 |                                                                                    |
| C                                        | 5.14447300                  | -1.38245700 | 0.31854500  |                                                                                    |
| H                                        | 4.05800500                  | 0.88293600  | 0.06708300  |                                                                                    |
| H                                        | 3.09631900                  | 3.20060400  | -0.22385600 |                                                                                    |
| H                                        | 1.10974500                  | 4.62570800  | -0.54073600 |                                                                                    |
| H                                        | 5.73102500                  | -2.28744400 | 0.42932400  |                                                                                    |
| H                                        | 5.27687900                  | -0.73743800 | 1.18588600  |                                                                                    |
| H                                        | 5.42499700                  | -0.85863400 | -0.59420500 |                                                                                    |
| O                                        | -2.78764800                 | 1.89069500  | -0.66153800 |                                                                                    |
| O                                        | -3.10527100                 | -0.71976500 | -0.37610000 |                                                                                    |
| C                                        | -3.36259900                 | -2.10172300 | 0.00047600  |                                                                                    |
| H                                        | -4.38935400                 | -2.08757400 | 0.35410600  |                                                                                    |
| H                                        | -2.70064000                 | -2.36108000 | 0.82267800  |                                                                                    |
| C                                        | -3.20558800                 | -3.02836400 | -1.18189800 |                                                                                    |
| H                                        | -2.17490200                 | -3.05692100 | -1.52912600 |                                                                                    |
| H                                        | -3.50083400                 | -4.03422700 | -0.88119600 |                                                                                    |
| H                                        | -3.85181900                 | -2.71089900 | -1.99985900 |                                                                                    |
| N                                        | 1.32416800                  | -2.71504200 | 0.07685900  |                                                                                    |
| H                                        | 0.39128300                  | -3.09714700 | 0.01978100  |                                                                                    |
| H                                        | 2.11757100                  | -3.32944100 | 0.17563400  |                                                                                    |
| O                                        | -1.86268700                 | 0.39402000  | 1.74215900  |                                                                                    |
| O                                        | -3.14310400                 | 0.77558400  | 2.04427400  |                                                                                    |
| H                                        | -3.16034900                 | 1.73778300  | 1.92769300  |                                                                                    |
| <u>Thermochemistry</u>                   |                             |             |             |                                                                                    |
| Zero-point correction=                   | 0.275748 (Hartree/Particle) |             |             |                                                                                    |
| Thermal correction to Energy=            | 0.295676                    |             |             |                                                                                    |
| Thermal correction to Enthalpy=          | 0.296620                    |             |             |                                                                                    |
| Thermal correction to Gibbs Free Energy= | 0.227051                    |             |             |                                                                                    |

Sum of electronic and zero-point Energies= -1082.077981  
 Sum of electronic and thermal Energies= -1082.058053  
 Sum of electronic and thermal Enthalpies= -1082.057109  
 Sum of electronic and thermal Free Energies= -1082.126677

HF=-1082.3537289 (Hartree/Particle)

| Compound C3 + HOO in the gas phase |             |             |             | RAF reaction                                                                       |
|------------------------------------|-------------|-------------|-------------|------------------------------------------------------------------------------------|
| 0 2                                |             |             |             | 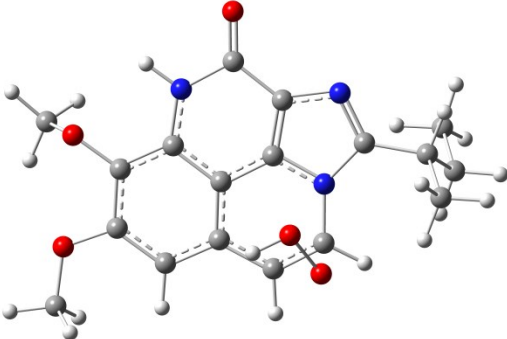 |
| O                                  | -0.19936400 | 3.89014700  | -0.81149600 |                                                                                    |
| C                                  | 0.68427700  | -0.03851200 | 0.05617900  |                                                                                    |
| C                                  | -0.62421200 | 0.43124800  | -0.02302500 |                                                                                    |
| C                                  | 1.67682800  | 0.91735600  | -0.16016400 |                                                                                    |
| C                                  | 0.93090000  | -1.38445200 | 0.34688400  |                                                                                    |
| C                                  | -1.04173600 | 1.69907900  | -0.29841800 |                                                                                    |
| C                                  | -0.03087400 | 2.72333600  | -0.54382800 |                                                                                    |
| C                                  | 2.27416600  | -1.79471600 | 0.42013000  |                                                                                    |
| C                                  | -1.52730900 | -1.72480300 | 0.32242700  |                                                                                    |
| H                                  | 2.51145500  | -2.82520400 | 0.63346700  |                                                                                    |
| H                                  | -2.38215900 | -2.30088700 | 0.63180100  |                                                                                    |
| C                                  | -0.22828900 | -2.19696600 | 0.55103400  |                                                                                    |
| H                                  | -0.12169400 | -3.24508700 | 0.78655300  |                                                                                    |
| C                                  | 3.00093500  | 0.50254600  | -0.07028500 |                                                                                    |
| O                                  | 3.98417400  | 1.41215300  | -0.31353700 |                                                                                    |
| C                                  | 4.77845100  | 1.76515200  | 0.82996900  |                                                                                    |
| H                                  | 4.13402900  | 2.14959900  | 1.62165300  |                                                                                    |
| H                                  | 5.33890900  | 0.90258900  | 1.18069300  |                                                                                    |
| H                                  | 5.45722700  | 2.54238900  | 0.49343800  |                                                                                    |
| N                                  | 1.28879400  | 2.21099700  | -0.44089800 |                                                                                    |
| H                                  | 2.01253600  | 2.88623500  | -0.63813900 |                                                                                    |
| N                                  | -1.72240900 | -0.35519200 | 0.15482300  |                                                                                    |
| C                                  | -2.81673900 | 0.49926700  | -0.05623600 |                                                                                    |
| N                                  | -2.41804200 | 1.71944700  | -0.30976800 |                                                                                    |
| C                                  | -4.24752000 | 0.08288300  | 0.06131100  |                                                                                    |
| H                                  | -4.79653500 | 1.00958000  | -0.11252500 |                                                                                    |
| C                                  | -4.58767900 | -0.40662600 | 1.47763800  |                                                                                    |
| H                                  | -4.09455400 | -1.36256200 | 1.67218700  |                                                                                    |
| H                                  | -5.66045200 | -0.60865500 | 1.50573900  |                                                                                    |
| C                                  | -4.21683200 | 0.60181500  | 2.56082600  |                                                                                    |
| H                                  | -4.53918200 | 0.25719600  | 3.54292000  |                                                                                    |
| H                                  | -3.13888500 | 0.76495800  | 2.59516200  |                                                                                    |
| H                                  | -4.68673300 | 1.56611400  | 2.36422600  |                                                                                    |
| C                                  | -4.65099900 | -0.93598500 | -1.00967700 |                                                                                    |
| H                                  | -4.41662600 | -0.56181100 | -2.00529800 |                                                                                    |
| H                                  | -4.12831300 | -1.88315700 | -0.88548600 |                                                                                    |
| H                                  | -5.72380900 | -1.12145100 | -0.94881800 |                                                                                    |
| C                                  | 3.28218400  | -0.85832900 | 0.20422500  |                                                                                    |
| O                                  | 4.60462700  | -1.15741000 | 0.23079300  |                                                                                    |
| C                                  | 4.97642700  | -2.51081500 | 0.44243300  |                                                                                    |
| H                                  | 4.56428600  | -3.15067100 | -0.33921000 |                                                                                    |
| H                                  | 6.06008600  | -2.52948900 | 0.39596900  |                                                                                    |

|                                              |             |             |                             |                                                                                     |
|----------------------------------------------|-------------|-------------|-----------------------------|-------------------------------------------------------------------------------------|
| H                                            | 4.64443400  | -2.85683600 | 1.42261400                  |                                                                                     |
| O                                            | -1.72005200 | -2.38947300 | -1.51381200                 |                                                                                     |
| O                                            | -1.23232500 | -1.40188900 | -2.31978400                 |                                                                                     |
| H                                            | -0.36077900 | -1.71671200 | -2.59189400                 |                                                                                     |
| <b>Thermochemistry</b>                       |             |             |                             |                                                                                     |
| Zero-point correction=                       |             |             | 0.369971 (Hartree/Particle) |                                                                                     |
| Thermal correction to Energy=                |             |             | 0.394431                    |                                                                                     |
| Thermal correction to Enthalpy=              |             |             | 0.395375                    |                                                                                     |
| Thermal correction to Gibbs Free Energy=     |             |             | 0.315115                    |                                                                                     |
| Sum of electronic and zero-point Energies=   |             |             | -1238.017449                |                                                                                     |
| Sum of electronic and thermal Energies=      |             |             | -1237.992989                |                                                                                     |
| Sum of electronic and thermal Enthalpies=    |             |             | -1237.992045                |                                                                                     |
| Sum of electronic and thermal Free Energies= |             |             | -1238.072305                |                                                                                     |
| HF=-1238.3874198 (Hartree/Particle)          |             |             |                             |                                                                                     |
| <b>Compound C3 + HOO in WATER</b>            |             |             |                             | <b>RAF reaction</b>                                                                 |
| 0 2                                          |             |             |                             |                                                                                     |
| O                                            | -0.23731800 | 3.85790800  | -0.85262100                 | 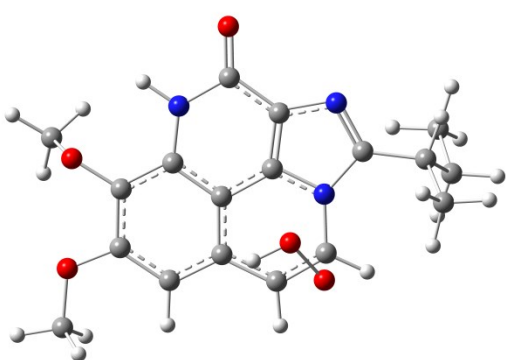 |
| C                                            | 0.69148200  | -0.05311500 | 0.05111400                  |                                                                                     |
| C                                            | -0.61775900 | 0.40002300  | -0.03823200                 |                                                                                     |
| C                                            | 1.67529200  | 0.90601500  | -0.17675500                 |                                                                                     |
| C                                            | 0.94481200  | -1.39637400 | 0.35504500                  |                                                                                     |
| C                                            | -1.03138100 | 1.66464200  | -0.33194600                 |                                                                                     |
| C                                            | -0.02770900 | 2.67150600  | -0.57563000                 |                                                                                     |
| C                                            | 2.28515500  | -1.79999700 | 0.44007200                  |                                                                                     |
| C                                            | -1.51165100 | -1.75254900 | 0.32162400                  |                                                                                     |
| H                                            | 2.52714500  | -2.82672300 | 0.66728300                  |                                                                                     |
| H                                            | -2.36523900 | -2.34015600 | 0.61351800                  |                                                                                     |
| C                                            | -0.21190400 | -2.21652700 | 0.54905200                  |                                                                                     |
| H                                            | -0.09821100 | -3.26266000 | 0.79090600                  |                                                                                     |
| C                                            | 2.99952500  | 0.49422500  | -0.08853400                 |                                                                                     |
| O                                            | 4.00865700  | 1.38362400  | -0.33891600                 |                                                                                     |
| C                                            | 4.58035700  | 1.95021100  | 0.86399700                  |                                                                                     |
| H                                            | 3.81396600  | 2.50235400  | 1.40656600                  |                                                                                     |
| H                                            | 4.99307400  | 1.15969400  | 1.48738800                  |                                                                                     |
| H                                            | 5.36765400  | 2.62194200  | 0.53698900                  |                                                                                     |
| N                                            | 1.27702600  | 2.20041800  | -0.47571300                 |                                                                                     |
| H                                            | 2.00101600  | 2.89054100  | -0.63492200                 |                                                                                     |
| N                                            | -1.71328000 | -0.38019000 | 0.14951200                  |                                                                                     |
| C                                            | -2.81136900 | 0.46552000  | -0.06630700                 |                                                                                     |
| N                                            | -2.41262000 | 1.68667000  | -0.34498400                 |                                                                                     |
| C                                            | -4.24143400 | 0.05324300  | 0.06550700                  |                                                                                     |
| H                                            | -4.80089500 | 0.96219200  | -0.15957600                 |                                                                                     |
| C                                            | -4.58643800 | -0.36592700 | 1.50316300                  |                                                                                     |
| H                                            | -4.05490000 | -1.28534300 | 1.75729100                  |                                                                                     |
| H                                            | -5.65145500 | -0.60503600 | 1.51888500                  |                                                                                     |
| C                                            | -4.28225900 | 0.71862900  | 2.52988800                  |                                                                                     |
| H                                            | -4.61010700 | 0.41312300  | 3.52355000                  |                                                                                     |
| H                                            | -3.21239300 | 0.92865100  | 2.58101400                  |                                                                                     |

|                                              |             |             |                             |  |
|----------------------------------------------|-------------|-------------|-----------------------------|--|
| H                                            | -4.79568900 | 1.64717200  | 2.27325600                  |  |
| C                                            | -4.64509800 | -1.02618700 | -0.94326700                 |  |
| H                                            | -4.34573000 | -0.75289800 | -1.95524500                 |  |
| H                                            | -4.20060100 | -1.98932300 | -0.69690800                 |  |
| H                                            | -5.72904700 | -1.14047700 | -0.92253400                 |  |
| C                                            | 3.28779300  | -0.85733100 | 0.21458400                  |  |
| O                                            | 4.61144900  | -1.14533300 | 0.25453200                  |  |
| C                                            | 4.98940800  | -2.49354200 | 0.56030500                  |  |
| H                                            | 4.60035300  | -3.17678600 | -0.19367700                 |  |
| H                                            | 6.07398100  | -2.50122300 | 0.54394300                  |  |
| H                                            | 4.62927300  | -2.77305500 | 1.54959000                  |  |
| O                                            | -1.64857000 | -2.38591700 | -1.57312800                 |  |
| O                                            | -1.10086700 | -1.39960400 | -2.34974200                 |  |
| H                                            | -0.18781300 | -1.68050100 | -2.51210200                 |  |
| <u>Thermochemistry</u>                       |             |             |                             |  |
| Zero-point correction=                       |             |             | 0.369248 (Hartree/Particle) |  |
| Thermal correction to Energy=                |             |             | 0.393573                    |  |
| Thermal correction to Enthalpy=              |             |             | 0.394517                    |  |
| Thermal correction to Gibbs Free Energy=     |             |             | 0.315029                    |  |
| Sum of electronic and zero-point Energies=   |             |             | -1238.061792                |  |
| Sum of electronic and thermal Energies=      |             |             | -1238.037468                |  |
| Sum of electronic and thermal Enthalpies=    |             |             | -1238.036523                |  |
| Sum of electronic and thermal Free Energies= |             |             | -1238.116012                |  |
| HF=-1238.4310406 (Hartree/Particle)          |             |             |                             |  |

**Table S4:** NBO analysis investigated at the transition states (TSs) of FHT reactions between C1–C3 compounds and HOO• radical

| Reactions      | Donor NBO (i)       | Acceptor NBO (j)      | E(2), kcal mol <sup>-1</sup> |
|----------------|---------------------|-----------------------|------------------------------|
| C1@C19H + HOO• | $\sigma(1)$ C19–H   | $\sigma^*(1)$ O34–O35 | 7.7                          |
|                | $\pi(1)$ O34–O35    | $\sigma^*(1)$ C19–H   | 44.8                         |
|                | LP(2) O34           | $\sigma^*(1)$ C19–H   | 27.2                         |
|                | LP(3) O34           | $\sigma^*(1)$ C19–H   | 255.8                        |
|                | LP(1) O35           | $\sigma^*(1)$ C19–H   | 324.3                        |
| C2@N14H + HOO• | $\sigma^*(1)$ N14–H | $\sigma^*(1)$ O34–O35 | 5.5                          |
| C3@C21H + HOO• | $\sigma^*(1)$ C21–H | $\sigma^*(1)$ O44–O45 | 1293.7                       |
|                | LP(1) O45           | $\sigma^*(1)$ C21–C24 | 77.5                         |
|                | LP(1) O44           | $\sigma^*(1)$ C21–C24 | 5.6                          |

**Table S5:** NPA charges, atomic spin densities (ASD), natural electron configuration (NEC) calculated at the transition states (TSs) for shifting-H, donor and acceptor of **C1 – C3**.

| Atom                  | NPA charges | ASD      | NEC                                   |
|-----------------------|-------------|----------|---------------------------------------|
| <b>C1@C19H + HOO•</b> |             |          |                                       |
| C19                   | -0.3535     | 0.41185  | 2S <sup>1.02</sup> 2p <sup>3.31</sup> |
| H                     | 0.3255      | -0.03654 | 1S <sup>0.67</sup>                    |
| O34                   | -0.3245     | 0.42642  | 2S <sup>1.81</sup> 2p <sup>4.49</sup> |
| <b>C2@N14H + HOO•</b> |             |          |                                       |
| N14                   | -0.6605     | 0.26019  | 2S <sup>1.39</sup> 2p <sup>4.25</sup> |
| H                     | 0.4294      | -0.01012 | 1S <sup>0.61</sup>                    |
| O34                   | -0.3943     | 0.32787  | 2S <sup>1.82</sup> 2p <sup>4.56</sup> |
| <b>C3@C21H + HOO•</b> |             |          |                                       |
| C21                   | -0.1832     | 0.46482  | 2S <sup>0.96</sup> 2p <sup>3.20</sup> |
| H                     | 0.3494      | -0.05014 | 1S <sup>0.64</sup>                    |
| O44                   | -0.3245     | 0.41883  | 2S <sup>1.80</sup> 2p <sup>4.51</sup> |

**Table S6:** Cartesian coordinates, and thermochemical properties for the complexes between three aaptamines derivatives with **Cu(II)** ion. All calculations were performed in water at the M05-2X/6-311++G(d,p) level of theory.

| Compound C1 – Cu(II) complex at O14O15 |             |                             |             |
|----------------------------------------|-------------|-----------------------------|-------------|
| 2                                      | 2           |                             |             |
| C                                      | -1.37135300 | 1.06195300                  | 0.00000300  |
| C                                      | -2.77044700 | 1.03713000                  | -0.01272900 |
| C                                      | -0.64468900 | -0.14620700                 | -0.02304000 |
| C                                      | -0.72764500 | 2.32483000                  | 0.03631000  |
| C                                      | -3.40632400 | -0.25174800                 | -0.07055800 |
| C                                      | -2.56396300 | -1.42922100                 | -0.09835400 |
| C                                      | 0.70764600  | 2.37978000                  | 0.02553800  |
| C                                      | -2.92306700 | 3.30661400                  | 0.06064900  |
| C                                      | 1.40183400  | 1.22378300                  | -0.01023600 |
| H                                      | 1.19376100  | 3.34395600                  | 0.03879600  |
| H                                      | -3.54883200 | 4.18848900                  | 0.08751000  |
| O                                      | 2.76134500  | 1.13470800                  | -0.05433700 |
| C                                      | 3.52244900  | 2.36086300                  | -0.10974200 |
| H                                      | 4.55851600  | 2.06373700                  | -0.20840500 |
| H                                      | 3.20768200  | 2.93246000                  | -0.97954400 |
| H                                      | 3.36482000  | 2.92047700                  | 0.80911200  |
| C                                      | 0.77182400  | -0.09855500                 | -0.00822900 |
| O                                      | 1.52171500  | -1.12600100                 | 0.00195700  |
| N                                      | -1.26587100 | -1.35662600                 | -0.06372900 |
| C                                      | -1.52759600 | 3.45013000                  | 0.06853200  |
| H                                      | -1.08901200 | 4.43800100                  | 0.09728800  |
| N                                      | -3.53984100 | 2.13926600                  | 0.01805400  |
| C                                      | -3.24474000 | -2.76336900                 | -0.18959000 |
| H                                      | -2.59916700 | -3.51880500                 | 0.25269200  |
| H                                      | -3.37846400 | -3.01113500                 | -1.24676800 |
| N                                      | -4.71478500 | -0.35016900                 | -0.10258900 |
| H                                      | -5.23619800 | 0.51835600                  | -0.10041500 |
| C                                      | -5.45087100 | -1.61611000                 | -0.12789300 |
| H                                      | -6.37689800 | -1.45967900                 | 0.41849000  |
| H                                      | -5.69672000 | -1.85613700                 | -1.16315700 |
| C                                      | -4.60927900 | -2.71380700                 | 0.49290700  |
| H                                      | -5.12728900 | -3.66346500                 | 0.37804900  |
| H                                      | -4.48591900 | -2.51775100                 | 1.55940300  |
| Cu                                     | 3.48020800  | -0.80265200                 | 0.02216500  |
| O                                      | 5.44784700  | -0.41554200                 | 0.04096400  |
| O                                      | 3.85144800  | -2.79833900                 | 0.02765300  |
| H                                      | 5.66692800  | 0.26497000                  | 0.68954300  |
| H                                      | 5.96885000  | -1.19118800                 | 0.28425900  |
| H                                      | 3.08164700  | -3.29274400                 | -0.28024000 |
| H                                      | 4.57224900  | -3.02493600                 | -0.57287000 |
| <u>Thermochemistry</u>                 |             |                             |             |
| Zero-point correction=                 |             | 0.319161 (Hartree/Particle) |             |

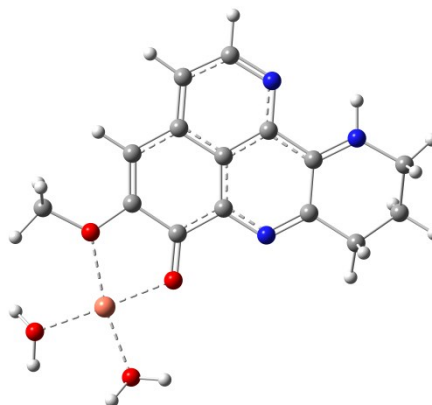

Thermal correction to Energy= 0.340569  
 Thermal correction to Enthalpy= 0.341514  
 Thermal correction to Gibbs Free Energy= 0.270080  
 Sum of electronic and zero-point Energies= -1242.809494  
 Sum of electronic and thermal Energies= -1242.788085  
 Sum of electronic and thermal Enthalpies= -1242.787141  
 Sum of electronic and thermal Free Energies= -1242.858574

HF=-1243.1286548 (Hartree/Particle)

**Compound C1 – Cu(II) complex at O14N1**

2 2

|    |             |             |             |
|----|-------------|-------------|-------------|
| C  | 0.24409900  | 1.72191400  | -0.02774900 |
| C  | -1.04319400 | 2.26061600  | -0.05052600 |
| C  | 0.42247200  | 0.33647500  | -0.01690200 |
| C  | 1.36407100  | 2.59148600  | -0.01480700 |
| C  | -2.14286900 | 1.33564700  | -0.06180700 |
| C  | -1.86105800 | -0.08424500 | -0.00803300 |
| C  | 2.69042400  | 2.03156800  | 0.01403800  |
| C  | -0.24230400 | 4.38617200  | -0.05199500 |
| C  | 2.86735400  | 0.68622100  | 0.02330800  |
| H  | 3.53120200  | 2.70947300  | 0.02853400  |
| H  | -0.44382300 | 5.44899600  | -0.06018600 |
| O  | 4.04672800  | 0.04259200  | 0.05333700  |
| C  | 5.22995100  | 0.85288400  | 0.09265900  |
| H  | 6.06021800  | 0.15589900  | 0.11682300  |
| H  | 5.28632900  | 1.47563600  | -0.79921900 |
| H  | 5.22962500  | 1.47046700  | 0.99000000  |
| C  | 1.72140400  | -0.22785100 | 0.00388800  |
| O  | 1.89398200  | -1.47923200 | 0.01039200  |
| N  | -0.62954400 | -0.52395000 | -0.00088400 |
| C  | 1.09411000  | 3.94420400  | -0.02705300 |
| H  | 1.89542300  | 4.67012700  | -0.01606400 |
| N  | -1.29105400 | 3.58453200  | -0.06410400 |
| C  | -3.01329800 | -1.04040700 | 0.03859200  |
| H  | -2.72096300 | -1.90285300 | 0.63277500  |
| H  | -3.22647000 | -1.37828900 | -0.98034900 |
| N  | -3.38090400 | 1.77184000  | -0.12298800 |
| H  | -3.50639700 | 2.77512400  | -0.17768300 |
| C  | -4.56079700 | 0.90642600  | -0.12298600 |
| H  | -5.36836800 | 1.46300200  | 0.34353700  |
| H  | -4.83873000 | 0.69018600  | -1.15545800 |
| C  | -4.25044500 | -0.37083900 | 0.63071200  |
| H  | -5.10394100 | -1.04173300 | 0.56583200  |
| H  | -4.07752200 | -0.13688600 | 1.68221900  |
| Cu | 0.19831300  | -2.53978400 | -0.01749900 |
| O  | -1.39417700 | -3.81222400 | -0.21222400 |
| O  | 1.38326500  | -4.19285600 | -0.01776500 |
| H  | -2.06757600 | -3.45734500 | -0.80545300 |
| H  | -1.11027600 | -4.64672300 | -0.60653800 |
| H  | 2.24219200  | -3.98954100 | 0.37288000  |

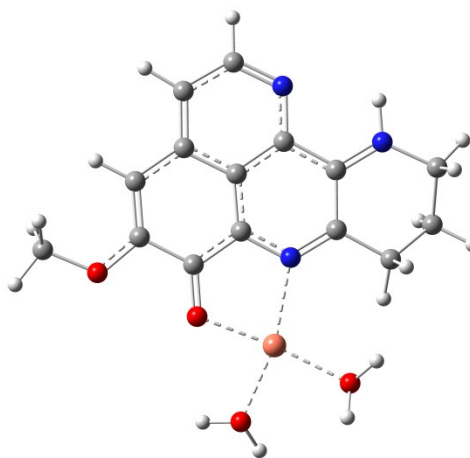



|                                               |             |             |                             |  |
|-----------------------------------------------|-------------|-------------|-----------------------------|--|
| H                                             | 1.02059800  | -4.92662900 | 0.49368400                  |  |
| <b>Thermochemistry</b>                        |             |             |                             |  |
| Zero-point correction=                        |             |             | 0.319201 (Hartree/Particle) |  |
| Thermal correction to Energy=                 |             |             | 0.340688                    |  |
| Thermal correction to Enthalpy=               |             |             | 0.341632                    |  |
| Thermal correction to Gibbs Free Energy=      |             |             | 0.270240                    |  |
| Sum of electronic and zero-point Energies=    |             |             | -1242.814621                |  |
| Sum of electronic and thermal Energies=       |             |             | -1242.793134                |  |
| Sum of electronic and thermal Enthalpies=     |             |             | -1242.792190                |  |
| Sum of electronic and thermal Free Energies=  |             |             | -1242.863582                |  |
| HF=-1243.1338219 (Hartree/Particle)           |             |             |                             |  |
| <b>Compound C2 – Cu(II) complex at O17O18</b> |             |             |                             |  |
| 2 2                                           |             |             |                             |  |
| O                                             | -5.11494300 | -1.43593300 | -0.07433700                 |  |
| N                                             | -0.44876400 | 2.95229500  | 0.12588300                  |  |
| N                                             | -0.40727000 | -1.22273700 | -0.23496800                 |  |
| C                                             | -1.64162400 | 0.84031000  | -0.00953800                 |  |
| C                                             | -2.89053800 | 1.51175300  | 0.08958000                  |  |
| C                                             | -1.58569000 | -0.55403800 | -0.12609600                 |  |
| C                                             | -0.45928500 | 1.60356000  | 0.01355900                  |  |
| C                                             | -2.78775300 | -1.30238600 | -0.13902700                 |  |
| C                                             | -4.10923300 | 0.74740600  | 0.07063600                  |  |
| C                                             | -4.06095300 | -0.60034100 | -0.04045800                 |  |
| C                                             | -2.85773100 | 2.88286400  | 0.19917000                  |  |
| C                                             | 0.78294100  | 0.90106400  | -0.07878800                 |  |
| C                                             | -1.61540100 | 3.55220400  | 0.21186300                  |  |
| C                                             | 0.67899100  | -0.53736300 | -0.21923400                 |  |
| C                                             | -6.42194400 | -0.84607700 | -0.00703900                 |  |
| H                                             | -5.04823300 | 1.27512100  | 0.14735100                  |  |
| H                                             | -3.77235900 | 3.45451400  | 0.27560200                  |  |
| H                                             | -1.60394400 | 4.63075900  | 0.29773800                  |  |
| H                                             | -7.11850600 | -1.67534600 | -0.05548100                 |  |
| H                                             | -6.56950900 | -0.17658600 | -0.85315300                 |  |
| H                                             | -6.53828000 | -0.30794300 | 0.93239800                  |  |
| O                                             | 1.92538600  | 1.44541800  | -0.04221300                 |  |
| O                                             | 1.90004800  | -1.13337600 | -0.35384500                 |  |
| C                                             | 2.01333300  | -2.57475800 | -0.10649800                 |  |
| H                                             | 2.91851900  | -2.85984100 | -0.63067200                 |  |
| H                                             | 1.15927800  | -3.05516000 | -0.57076600                 |  |
| C                                             | 2.10081400  | -2.82883500 | 1.37697500                  |  |
| H                                             | 1.19466500  | -2.50099900 | 1.88516300                  |  |
| H                                             | 2.22459600  | -3.89865200 | 1.54621500                  |  |
| H                                             | 2.95838200  | -2.30664500 | 1.80025000                  |  |
| N                                             | -2.79613300 | -2.61325800 | -0.24052400                 |  |
| H                                             | -1.92445300 | -3.11859000 | -0.30834900                 |  |
| H                                             | -3.67025900 | -3.11741700 | -0.24761000                 |  |
| Cu                                            | 3.47868100  | 0.19637500  | -0.15210300                 |  |
| O                                             | 4.73095600  | 1.78589400  | 0.03906400                  |  |
| O                                             | 4.93021700  | -1.18260000 | -0.16071900                 |  |

|                                              |             |             |                             |  |
|----------------------------------------------|-------------|-------------|-----------------------------|--|
| H                                            | 4.33115400  | 2.46477200  | 0.59683300                  |  |
| H                                            | 5.56816200  | 1.54978800  | 0.45682600                  |  |
| H                                            | 5.80134800  | -0.76870500 | -0.11614400                 |  |
| H                                            | 4.92398700  | -1.70545600 | -0.97217300                 |  |
| <b>Thermochemistry</b>                       |             |             |                             |  |
| Zero-point correction=                       |             |             | 0.313888 (Hartree/Particle) |  |
| Thermal correction to Energy=                |             |             | 0.337378                    |  |
| Thermal correction to Enthalpy=              |             |             | 0.338322                    |  |
| Thermal correction to Gibbs Free Energy=     |             |             | 0.261315                    |  |
| Sum of electronic and zero-point Energies=   |             |             | -1279.931023                |  |
| Sum of electronic and thermal Energies=      |             |             | -1279.907532                |  |
| Sum of electronic and thermal Enthalpies=    |             |             | -1279.906588                |  |
| Sum of electronic and thermal Free Energies= |             |             | -1279.983595                |  |
| HF=-1280.2449103 (Hartree/Particle)          |             |             |                             |  |
| <b>Compound C2 – Cu(II) complex at O18N1</b> |             |             |                             |  |
| 2 2                                          |             |             |                             |  |
| O                                            | -3.41276800 | -2.78117100 | 0.19037300                  |  |
| N                                            | -1.88041500 | 3.41167500  | -0.20339500                 |  |
| N                                            | 0.44418700  | -0.03863700 | -0.04448100                 |  |
| C                                            | -1.72260500 | 0.99980300  | -0.06313800                 |  |
| C                                            | -3.13606600 | 0.89328500  | -0.01548000                 |  |
| C                                            | -0.91949900 | -0.15865200 | -0.02400700                 |  |
| C                                            | -1.15438400 | 2.28250400  | -0.15578700                 |  |
| C                                            | -1.51400900 | -1.43017500 | 0.06111400                  |  |
| C                                            | -3.74379000 | -0.40285400 | 0.07389600                  |  |
| C                                            | -2.96929500 | -1.51226200 | 0.10909900                  |  |
| C                                            | -3.86595800 | 2.06640200  | -0.05983300                 |  |
| C                                            | 0.29694800  | 2.40617000  | -0.22447100                 |  |
| C                                            | -3.19617300 | 3.29253800  | -0.15266400                 |  |
| C                                            | 0.99748100  | 1.12050100  | -0.11462300                 |  |
| C                                            | -4.83305400 | -2.97889700 | 0.25098900                  |  |
| H                                            | -4.82117800 | -0.46570800 | 0.10918600                  |  |
| H                                            | -4.94647400 | 2.04327700  | -0.02484400                 |  |
| H                                            | -3.76931100 | 4.20941000  | -0.18641500                 |  |
| H                                            | -4.97557200 | -4.05184700 | 0.31178900                  |  |
| H                                            | -5.30161600 | -2.58510700 | -0.64967500                 |  |
| H                                            | -5.23806400 | -2.49260500 | 1.13726500                  |  |
| O                                            | 0.91874600  | 3.45661400  | -0.37550200                 |  |
| O                                            | 2.36444600  | 1.07356200  | -0.16149800                 |  |
| C                                            | 3.07625100  | 1.86660500  | 0.87299000                  |  |
| H                                            | 2.40195400  | 1.95693800  | 1.72181900                  |  |
| H                                            | 3.26933200  | 2.84064800  | 0.43888400                  |  |
| C                                            | 4.34038500  | 1.14057300  | 1.23983000                  |  |
| H                                            | 5.01302300  | 1.07212900  | 0.38637900                  |  |
| H                                            | 4.83987400  | 1.70159500  | 2.02984000                  |  |
| H                                            | 4.11543100  | 0.13903500  | 1.60857600                  |  |
| N                                            | -0.83531400 | -2.56406700 | 0.10534400                  |  |
| H                                            | 0.17499200  | -2.59418100 | 0.07792900                  |  |
| H                                            | -1.34260100 | -3.43354000 | 0.16888500                  |  |

|                                                |                             |             |             |  |
|------------------------------------------------|-----------------------------|-------------|-------------|--|
| Cu                                             | 2.45937500                  | -1.07033200 | -0.18893100 |  |
| O                                              | 4.35645400                  | -1.34428500 | -0.83011200 |  |
| O                                              | 2.15219900                  | -3.03057500 | 0.06055300  |  |
| H                                              | 4.68874600                  | -0.54778700 | -1.26304100 |  |
| H                                              | 4.38564500                  | -2.04542500 | -1.49376300 |  |
| H                                              | 2.54043700                  | -3.33749900 | 0.89059400  |  |
| H                                              | 2.57426800                  | -3.53890300 | -0.64470900 |  |
| Thermochemistry                                |                             |             |             |  |
| Zero-point correction=                         | 0.313436 (Hartree/Particle) |             |             |  |
| Thermal correction to Energy=                  | 0.337003                    |             |             |  |
| Thermal correction to Enthalpy=                | 0.337947                    |             |             |  |
| Thermal correction to Gibbs Free Energy=       | 0.260570                    |             |             |  |
| Sum of electronic and zero-point Energies=     | -1279.910889                |             |             |  |
| Sum of electronic and thermal Energies=        | -1279.887322                |             |             |  |
| Sum of electronic and thermal Enthalpies=      | -1279.886378                |             |             |  |
| Sum of electronic and thermal Free Energies=   | -1279.963756                |             |             |  |
| HF=-1280.2243256 (Hartree/Particle)            |                             |             |             |  |
| <b>Compound C2 – Cu(II) complex at N14 O15</b> |                             |             |             |  |
| 2 2                                            |                             |             |             |  |
| O                                              | 2.45741400                  | -1.36536400 | -0.35784100 |  |
| N                                              | -3.82448100                 | -2.21427200 | 0.29322000  |  |
| N                                              | -1.46603700                 | 1.22027500  | -0.32854900 |  |
| C                                              | -1.65340900                 | -1.22418400 | -0.02377800 |  |
| C                                              | -1.02303600                 | -2.48527200 | 0.05057100  |  |
| C                                              | -0.89379300                 | -0.04373500 | -0.24519700 |  |
| C                                              | -3.04827700                 | -1.16001200 | 0.10602500  |  |
| C                                              | 0.46329100                  | -0.16513400 | -0.38238400 |  |
| C                                              | 0.39017200                  | -2.58355000 | -0.06371900 |  |
| C                                              | 1.09659100                  | -1.43610300 | -0.26539800 |  |
| C                                              | -1.85682800                 | -3.59462400 | 0.25212300  |  |
| C                                              | -3.68477900                 | 0.17154900  | 0.02776600  |  |
| C                                              | -3.22135800                 | -3.41117500 | 0.36288700  |  |
| C                                              | -2.73285300                 | 1.32728600  | -0.19782700 |  |
| C                                              | 3.21127000                  | -2.59687100 | -0.28295900 |  |
| H                                              | 0.86533000                  | -3.54839800 | 0.02510300  |  |
| H                                              | -1.43572700                 | -4.58819200 | 0.31845600  |  |
| H                                              | -3.86879300                 | -4.26340100 | 0.51529400  |  |
| H                                              | 4.24563600                  | -2.31316800 | -0.43323400 |  |
| H                                              | 2.87848600                  | -3.26094900 | -1.07681700 |  |
| H                                              | 3.06850400                  | -3.04861700 | 0.69595900  |  |
| O                                              | -4.87526500                 | 0.36610900  | 0.13221500  |  |
| O                                              | -3.37005400                 | 2.48340300  | -0.25666400 |  |
| C                                              | -2.58828800                 | 3.70091400  | -0.42456700 |  |
| H                                              | -3.31063100                 | 4.41658300  | -0.80329600 |  |
| H                                              | -1.82575100                 | 3.51814200  | -1.17635500 |  |
| C                                              | -2.00497700                 | 4.15044100  | 0.89475700  |  |
| H                                              | -1.28798300                 | 3.42865000  | 1.28100800  |  |
| H                                              | -1.49262900                 | 5.10101500  | 0.74419200  |  |

|    |             |             |             |
|----|-------------|-------------|-------------|
| H  | -2.79725500 | 4.29766900  | 1.62786000  |
| N  | 1.32096600  | 0.95280500  | -0.61953300 |
| H  | 0.90107300  | 1.80622400  | -0.25877400 |
| H  | 1.45149500  | 1.08810000  | -1.62296300 |
| Cu | 3.23520700  | 0.55842800  | 0.04080600  |
| O  | 5.07195000  | -0.04614200 | 0.64608000  |
| O  | 3.67533700  | 2.55021300  | 0.01114100  |
| H  | 5.00527100  | -0.77359000 | 1.27763700  |
| H  | 5.53796100  | 0.66531700  | 1.10256500  |
| H  | 3.07280800  | 3.05132800  | 0.57512000  |
| H  | 4.56064200  | 2.71427400  | 0.35965500  |

### Thermochemistry

|                                              |                             |
|----------------------------------------------|-----------------------------|
| Zero-point correction=                       | 0.315588 (Hartree/Particle) |
| Thermal correction to Energy=                | 0.338742                    |
| Thermal correction to Enthalpy=              | 0.339686                    |
| Thermal correction to Gibbs Free Energy=     | 0.263558                    |
| Sum of electronic and zero-point Energies=   | -1279.914238                |
| Sum of electronic and thermal Energies=      | -1279.891084                |
| Sum of electronic and thermal Enthalpies=    | -1279.890140                |
| Sum of electronic and thermal Free Energies= | -1279.966268                |

HF=-1280.2298261 (Hartree/Particle)

### Compound C2 – Cu(II) complex at O17 N1

|     |             |             |             |  |
|-----|-------------|-------------|-------------|--|
| 2 2 |             |             |             |  |
| O   | 5.01844000  | -1.00923400 | 0.03007700  |  |
| N   | -1.33353700 | -1.43441800 | -0.02768700 |  |
| N   | 1.23709400  | 1.81155700  | -0.24548000 |  |
| C   | 0.92392200  | -0.57944900 | -0.08157600 |  |
| C   | 1.44335800  | -1.89966000 | 0.02666100  |  |
| C   | 1.74296400  | 0.54940200  | -0.14976800 |  |
| C   | -0.45635500 | -0.40534100 | -0.11034700 |  |
| C   | 3.14294200  | 0.36558800  | -0.10582600 |  |
| C   | 2.86741900  | -2.07793000 | 0.06101300  |  |
| C   | 3.67794600  | -0.99325700 | 0.00039100  |  |
| C   | 0.52920400  | -2.93069600 | 0.09761700  |  |
| C   | -1.00957000 | 0.90270700  | -0.22337700 |  |
| C   | -0.85302500 | -2.65785700 | 0.07290700  |  |
| C   | -0.04416700 | 1.99028100  | -0.27996300 |  |
| C   | 5.66360000  | -2.28851800 | 0.13563900  |  |
| H   | 3.26696100  | -3.07754600 | 0.13988900  |  |
| H   | 0.85752200  | -3.95694300 | 0.17993500  |  |
| H   | -1.56686600 | -3.46634900 | 0.14151200  |  |
| H   | 6.72656600  | -2.07674100 | 0.14691200  |  |
| H   | 5.40794800  | -2.90306000 | -0.72600300 |  |
| H   | 5.36410800  | -2.77836600 | 1.06074100  |  |
| O   | -2.25934000 | 1.08140000  | -0.25600600 |  |
| O   | -0.60487900 | 3.20274700  | -0.37906500 |  |
| C   | 0.25836500  | 4.36669300  | -0.29417100 |  |
| H   | -0.33839300 | 5.16290800  | -0.72814000 |  |

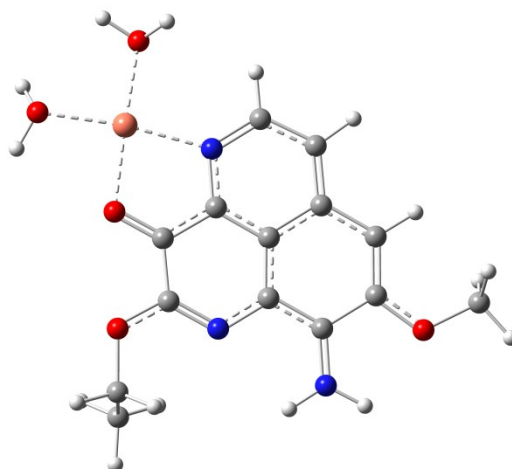

|    |             |             |             |
|----|-------------|-------------|-------------|
| H  | 1.13725100  | 4.19777600  | -0.91047400 |
| C  | 0.61321500  | 4.66923200  | 1.14404700  |
| H  | 1.19069100  | 3.86172700  | 1.59065700  |
| H  | 1.21108900  | 5.58040600  | 1.17737900  |
| H  | -0.29140100 | 4.82761900  | 1.73042300  |
| N  | 3.98800900  | 1.37096700  | -0.15553700 |
| H  | 3.63908400  | 2.31606800  | -0.22505000 |
| H  | 4.98258400  | 1.20427800  | -0.11686700 |
| Cu | -3.24618600 | -0.67932100 | -0.02949900 |
| O  | -5.02536900 | 0.28750200  | -0.06616100 |
| O  | -4.14639000 | -2.45639100 | 0.39841100  |
| H  | -4.90927700 | 1.22820600  | 0.11569700  |
| H  | -5.64101400 | -0.04387700 | 0.59912700  |
| H  | -5.10662800 | -2.38290100 | 0.33115900  |
| H  | -3.89037800 | -3.14502400 | -0.22802800 |

### Thermochemistry

|                                              |                             |
|----------------------------------------------|-----------------------------|
| Zero-point correction=                       | 0.314541 (Hartree/Particle) |
| Thermal correction to Energy=                | 0.337883                    |
| Thermal correction to Enthalpy=              | 0.338827                    |
| Thermal correction to Gibbs Free Energy=     | 0.262731                    |
| Sum of electronic and zero-point Energies=   | -1279.938240                |
| Sum of electronic and thermal Energies=      | -1279.914898                |
| Sum of electronic and thermal Enthalpies=    | -1279.913954                |
| Sum of electronic and thermal Free Energies= | -1279.990050                |

HF=-1280.2527811 (Hartree/Particle)

### Compound C3 – Cu(II) complex at O14 O15

|     |             |             |             |
|-----|-------------|-------------|-------------|
| 2 2 |             |             |             |
| O   | -1.65970800 | 3.78023200  | 0.05236900  |
| C   | -0.81502600 | -0.24615400 | -0.20640600 |
| C   | -2.11355500 | 0.24496300  | -0.16514000 |
| C   | 0.19311800  | 0.72516300  | -0.17818200 |
| C   | -0.60398800 | -1.62511900 | -0.26453900 |
| C   | -2.50645800 | 1.55029000  | -0.09854200 |
| C   | -1.48484000 | 2.56177000  | -0.03870200 |
| C   | 0.71510800  | -2.08111100 | -0.28576500 |
| C   | -3.04713900 | -1.92350700 | -0.25451100 |
| H   | 0.93469700  | -3.13747700 | -0.30645000 |
| H   | -3.93463300 | -2.53274300 | -0.27414600 |
| C   | -1.80125200 | -2.44749300 | -0.28620800 |
| H   | -1.70102100 | -3.52215000 | -0.33194200 |
| C   | 1.49564000  | 0.25238000  | -0.25108500 |
| O   | 2.59246800  | 1.10028000  | -0.27161200 |
| C   | 2.76808500  | 1.77381300  | -1.56782600 |
| H   | 2.93476400  | 1.01612200  | -2.32918100 |
| H   | 1.88419800  | 2.36360200  | -1.78865100 |
| H   | 3.63712500  | 2.41159800  | -1.44849700 |
| N   | -0.18390600 | 2.05463500  | -0.08641500 |
| H   | 0.53911300  | 2.75905100  | -0.00965200 |

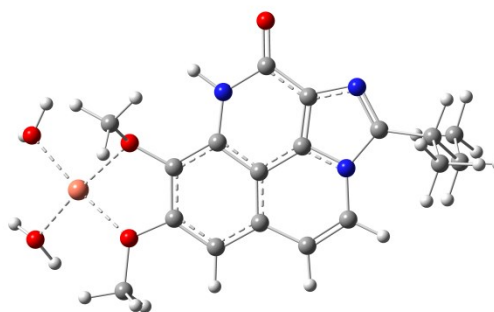

|                                               |                             |             |             |
|-----------------------------------------------|-----------------------------|-------------|-------------|
| N                                             | -3.22394900                 | -0.53599000 | -0.19377400 |
| C                                             | -4.30400100                 | 0.35181000  | -0.14243100 |
| N                                             | -3.88490000                 | 1.59766700  | -0.08493200 |
| C                                             | -5.73618200                 | -0.07117700 | -0.16604500 |
| H                                             | -6.29639100                 | 0.86235300  | -0.09981800 |
| C                                             | -6.11060100                 | -0.92806000 | 1.05265900  |
| H                                             | -5.59767500                 | -1.89035200 | 1.00537400  |
| H                                             | -7.17897500                 | -1.13910200 | 0.97944500  |
| C                                             | -5.80544300                 | -0.23575100 | 2.37578000  |
| H                                             | -6.15029500                 | -0.83725900 | 3.21678300  |
| H                                             | -4.73320100                 | -0.07167000 | 2.49902600  |
| H                                             | -6.30217700                 | 0.73503600  | 2.42598800  |
| C                                             | -6.09812800                 | -0.76267400 | -1.48486500 |
| H                                             | -5.84918500                 | -0.13003900 | -2.33688900 |
| H                                             | -5.57708700                 | -1.71348400 | -1.59734800 |
| H                                             | -7.16960600                 | -0.96234000 | -1.50363900 |
| C                                             | 1.72887500                  | -1.13162300 | -0.27807300 |
| O                                             | 3.06218400                  | -1.46080800 | -0.27919000 |
| C                                             | 3.43453800                  | -2.85209900 | -0.41720400 |
| H                                             | 2.98065000                  | -3.25037800 | -1.32061600 |
| H                                             | 4.51395600                  | -2.85477900 | -0.50473000 |
| H                                             | 3.11347000                  | -3.40098100 | 0.46452200  |
| Cu                                            | 4.34818300                  | 0.03844600  | 0.29259900  |
| O                                             | 5.44138700                  | 1.69574400  | 0.64553000  |
| O                                             | 5.89374300                  | -1.13861100 | 0.88656000  |
| H                                             | 4.88298500                  | 2.48313100  | 0.61493800  |
| H                                             | 5.83715700                  | 1.67768200  | 1.52594000  |
| H                                             | 5.58389500                  | -1.88842100 | 1.41024300  |
| H                                             | 6.50712600                  | -0.65373200 | 1.45303500  |
| <b>Thermochemistry</b>                        |                             |             |             |
| Zero-point correction=                        | 0.408647 (Hartree/Particle) |             |             |
| Thermal correction to Energy=                 | 0.435957                    |             |             |
| Thermal correction to Enthalpy=               | 0.436901                    |             |             |
| Thermal correction to Gibbs Free Energy=      | 0.352643                    |             |             |
| Sum of electronic and zero-point Energies=    | -1435.908484                |             |             |
| Sum of electronic and thermal Energies=       | -1435.881174                |             |             |
| Sum of electronic and thermal Enthalpies=     | -1435.880230                |             |             |
| Sum of electronic and thermal Free Energies=  | -1435.964488                |             |             |
| HF=-1436.3171307 (Hartree/Particle)           |                             |             |             |
| <b>Compound C3 – Cu(II) complex at O18N19</b> |                             |             |             |
| 2 2                                           |                             |             |             |
| O                                             | 1.01132600                  | -2.63573400 | -0.15733400 |
| C                                             | -1.62100700                 | 0.53043600  | -0.12276900 |
| C                                             | -0.24917400                 | 0.66516200  | -0.15170300 |
| C                                             | -2.10050600                 | -0.78671200 | -0.10822000 |
| C                                             | -2.40260800                 | 1.68344600  | -0.12357800 |
| C                                             | 0.61447300                  | -0.36700800 | -0.16497200 |
| C                                             | 0.16753000                  | -1.69992300 | -0.14617200 |
| C                                             | -3.78563000                 | 1.51012300  | -0.11138200 |

|    |             |             |             |
|----|-------------|-------------|-------------|
| C  | -0.29639300 | 3.00342900  | -0.16981100 |
| H  | -4.44366200 | 2.36548900  | -0.11645400 |
| H  | 0.24489300  | 3.93418300  | -0.17458300 |
| C  | -1.64928500 | 2.93451300  | -0.14117500 |
| H  | -2.19197200 | 3.86896700  | -0.13021200 |
| C  | -3.47652700 | -0.94313400 | -0.09422000 |
| O  | -4.02377800 | -2.19701200 | -0.12303000 |
| C  | -4.42284100 | -2.67253400 | 1.18400400  |
| H  | -3.55145000 | -2.72120500 | 1.83591000  |
| H  | -5.17694300 | -2.01103100 | 1.60548700  |
| H  | -4.83476400 | -3.66505800 | 1.03169600  |
| N  | -1.18782000 | -1.85275600 | -0.11872900 |
| H  | -1.56235200 | -2.79539000 | -0.10089900 |
| N  | 0.46462600  | 1.81538800  | -0.18484700 |
| C  | 1.81067300  | 1.43167800  | -0.22416900 |
| N  | 1.89481300  | 0.10637700  | -0.20928100 |
| C  | 2.96764300  | 2.36746300  | -0.28713900 |
| H  | 3.84122100  | 1.72056600  | -0.37582500 |
| C  | 3.10521600  | 3.17931000  | 1.00954500  |
| H  | 2.24713900  | 3.84647200  | 1.11605000  |
| H  | 3.98791600  | 3.81074200  | 0.89703200  |
| C  | 3.24632800  | 2.29289400  | 2.24134300  |
| H  | 3.44473200  | 2.89238600  | 3.12952700  |
| H  | 2.33620300  | 1.71811800  | 2.42300300  |
| H  | 4.07132300  | 1.58760900  | 2.11516700  |
| C  | 2.89750000  | 3.26558800  | -1.52575900 |
| H  | 2.79461400  | 2.67202600  | -2.43383900 |
| H  | 2.06288600  | 3.96333200  | -1.46866300 |
| H  | 3.81741700  | 3.84573100  | -1.59278300 |
| C  | -4.30123100 | 0.20715600  | -0.10115200 |
| O  | -5.62513700 | -0.07008900 | -0.10668700 |
| C  | -6.54353900 | 1.03114200  | -0.11593100 |
| H  | -6.40397200 | 1.63251600  | -1.01324300 |
| H  | -7.53122300 | 0.58306700  | -0.11857200 |
| H  | -6.41227500 | 1.64075500  | 0.77701200  |
| Cu | 2.93854100  | -1.72772600 | -0.15509300 |
| O  | 4.78641500  | -0.91303500 | 0.00775600  |
| O  | 3.64038700  | -3.61361600 | -0.31900400 |
| H  | 4.78184100  | -0.13246300 | 0.57740300  |
| H  | 5.40985700  | -1.53278300 | 0.40746200  |
| H  | 3.05715700  | -4.23762100 | 0.13053700  |
| H  | 4.51493300  | -3.72770400 | 0.07244700  |

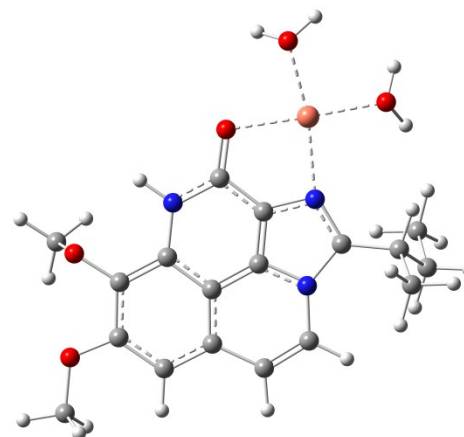

### Thermochemistry

|                                            |                             |
|--------------------------------------------|-----------------------------|
| Zero-point correction=                     | 0.407539 (Hartree/Particle) |
| Thermal correction to Energy=              | 0.435540                    |
| Thermal correction to Enthalpy=            | 0.436484                    |
| Thermal correction to Gibbs Free Energy=   | 0.350086                    |
| Sum of electronic and zero-point Energies= | -1435.912648                |
| Sum of electronic and thermal Energies=    | -1435.884647                |
| Sum of electronic and thermal Enthalpies=  | -1435.883703                |

Sum of electronic and thermal Free Energies= -1435.970101

HF=-1436.320187 (Hartree/Particle)



**Table S7:** Cartesian coordinates, and thermochemical properties for the complexes between three aaptamines derivatives with **Cu(I)** ion. All calculations were performed in water at the M05-2X/6-311++G(d,p) level of theory.

| Compound C1 – Cu(I) complex at O14O15 |                             |             |             |
|---------------------------------------|-----------------------------|-------------|-------------|
| I 1                                   |                             |             |             |
| C                                     | -1.45002400                 | 1.04228300  | -0.03919800 |
| C                                     | -2.84887500                 | 0.98467500  | -0.08057300 |
| C                                     | -0.70044700                 | -0.14568300 | 0.02604500  |
| C                                     | -0.82510600                 | 2.31758000  | -0.06605800 |
| C                                     | -3.45769500                 | -0.31290700 | -0.06794000 |
| C                                     | -2.59797000                 | -1.45943500 | -0.00652300 |
| C                                     | 0.61268600                  | 2.39933500  | -0.03372500 |
| C                                     | -3.04119700                 | 3.25113700  | -0.15791000 |
| C                                     | 1.35093700                  | 1.26884200  | 0.02125600  |
| H                                     | 1.07029500                  | 3.37744900  | -0.05821200 |
| H                                     | -3.67963600                 | 4.12380800  | -0.20227600 |
| O                                     | 2.69607300                  | 1.21617400  | 0.05049400  |
| C                                     | 3.41081800                  | 2.45959000  | 0.04436500  |
| H                                     | 4.46202700                  | 2.19312000  | 0.07136800  |
| H                                     | 3.18587300                  | 3.01425900  | -0.86559200 |
| H                                     | 3.14520800                  | 3.04417800  | 0.92421500  |
| C                                     | 0.73708200                  | -0.07966300 | 0.06798500  |
| O                                     | 1.46680200                  | -1.08823700 | 0.13988600  |
| N                                     | -1.29277200                 | -1.35732300 | 0.04714900  |
| C                                     | -1.64483700                 | 3.42329600  | -0.12551800 |
| H                                     | -1.22832600                 | 4.42090500  | -0.14764400 |
| N                                     | -3.64048400                 | 2.07789600  | -0.13827400 |
| C                                     | -3.23787900                 | -2.81851400 | -0.01363800 |
| H                                     | -2.58537800                 | -3.51669500 | 0.50672900  |
| H                                     | -3.33226900                 | -3.15762700 | -1.04933400 |
| N                                     | -4.77468100                 | -0.44040200 | -0.11560600 |
| H                                     | -5.31374100                 | 0.41238600  | -0.17568500 |
| C                                     | -5.47211600                 | -1.72583900 | -0.08961700 |
| H                                     | -6.42188400                 | -1.57132100 | 0.41549200  |
| H                                     | -5.67518000                 | -2.04404400 | -1.11353500 |
| C                                     | -4.62274000                 | -2.75958300 | 0.62589500  |
| H                                     | -5.11398300                 | -3.72839200 | 0.56179800  |
| H                                     | -4.53409900                 | -2.49041000 | 1.67997900  |
| Cu                                    | 3.52236200                  | -1.04047100 | -0.01252300 |
| O                                     | 5.13110400                  | -0.50568000 | 1.37466200  |
| O                                     | 4.85414600                  | -2.03430600 | -1.35983800 |
| H                                     | 5.00892700                  | 0.42107900  | 1.60739800  |
| H                                     | 5.95343300                  | -0.53116400 | 0.87383000  |
| H                                     | 4.66193300                  | -1.83320600 | -2.28147600 |
| H                                     | 5.74301900                  | -1.69615700 | -1.20749600 |
| <u>Thermochemistry</u>                |                             |             |             |
| Zero-point correction=                | 0.314525 (Hartree/Particle) |             |             |
| Thermal correction to Energy=         | 0.338162                    |             |             |

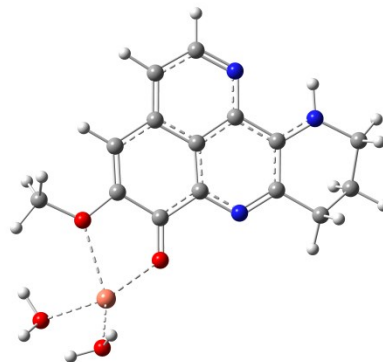

Thermal correction to Enthalpy= 0.339106  
 Thermal correction to Gibbs Free Energy= 0.261548  
 Sum of electronic and zero-point Energies= -1242.974189  
 Sum of electronic and thermal Energies= -1242.950551  
 Sum of electronic and thermal Enthalpies= -1242.949607  
 Sum of electronic and thermal Free Energies= -1243.027165

HF=-1243.2887131 (Hartree/Particle)

**Compound C1 – Cu(I) complex at O14N1**

|    |             |             |             |
|----|-------------|-------------|-------------|
| 1  | 1           |             |             |
| C  | 1.12610100  | 1.31833200  | -0.01245200 |
| C  | 0.27878500  | 2.43139400  | -0.07474100 |
| C  | 0.58619200  | 0.02688900  | 0.03768800  |
| C  | 2.53150300  | 1.52405400  | 0.00216400  |
| C  | -1.13348700 | 2.18940000  | -0.09129300 |
| C  | -1.58704500 | 0.83516700  | -0.04483600 |
| C  | 3.41335400  | 0.38367900  | 0.06921000  |
| C  | 2.03475000  | 3.87673500  | -0.10961900 |
| C  | 2.90861600  | -0.87008800 | 0.11983200  |
| H  | 4.47778900  | 0.56780900  | 0.07846800  |
| H  | 2.39142200  | 4.89773700  | -0.14816600 |
| O  | 3.62807000  | -2.00440600 | 0.18572100  |
| C  | 5.05518000  | -1.87071400 | 0.20620000  |
| H  | 5.44362200  | -2.88163200 | 0.26102400  |
| H  | 5.39893800  | -1.38394900 | -0.70592000 |
| H  | 5.36461400  | -1.29983000 | 1.08107900  |
| C  | 1.44778500  | -1.13213400 | 0.10982400  |
| O  | 1.01529200  | -2.29093400 | 0.15921700  |
| N  | -0.74433600 | -0.17491700 | 0.02313700  |
| C  | 2.97308000  | 2.82696400  | -0.04847000 |
| H  | 4.02977000  | 3.05607400  | -0.04113200 |
| N  | 0.72893200  | 3.70524100  | -0.12310300 |
| C  | -3.06227200 | 0.56784300  | -0.07289100 |
| H  | -3.25439600 | -0.36892900 | 0.45257300  |
| H  | -3.37765700 | 0.43770800  | -1.11210900 |
| N  | -1.99400500 | 3.19716100  | -0.15092000 |
| H  | -1.60486900 | 4.12801000  | -0.20045200 |
| C  | -3.44642200 | 3.02583800  | -0.16140000 |
| H  | -3.88109800 | 3.89118600  | 0.33163600  |
| H  | -3.79907300 | 3.00555800  | -1.19389100 |
| C  | -3.82152000 | 1.73754700  | 0.54873800  |
| H  | -4.89492600 | 1.58288100  | 0.46167500  |
| H  | -3.57229600 | 1.82033400  | 1.60802000  |
| Cu | -1.37449800 | -2.14241400 | 0.04482100  |
| O  | -2.72804600 | -3.33278300 | 1.15905800  |
| O  | -1.39087200 | -3.46676500 | -1.73787600 |
| H  | -3.52860200 | -2.82945300 | 1.34175700  |
| H  | -3.01165200 | -4.06702400 | 0.60356300  |
| H  | -0.46585900 | -3.69302500 | -1.88213400 |
| H  | -1.81260000 | -4.29217100 | -1.47628800 |

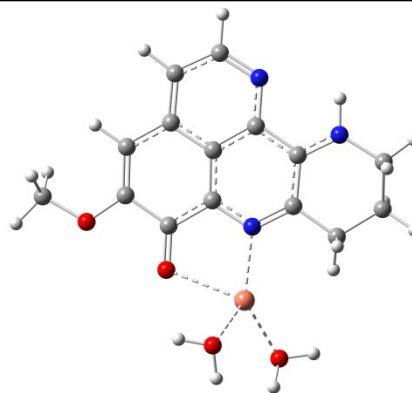

|                                              |                             |             |             |
|----------------------------------------------|-----------------------------|-------------|-------------|
| Thermochemistry                              |                             |             |             |
| Zero-point correction=                       | 0.314179 (Hartree/Particle) |             |             |
| Thermal correction to Energy=                | 0.338127                    |             |             |
| Thermal correction to Enthalpy=              | 0.339071                    |             |             |
| Thermal correction to Gibbs Free Energy=     | 0.260729                    |             |             |
| Sum of electronic and zero-point Energies=   | -1242.985658                |             |             |
| Sum of electronic and thermal Energies=      | -1242.961709                |             |             |
| Sum of electronic and thermal Enthalpies=    | -1242.960765                |             |             |
| Sum of electronic and thermal Free Energies= | -1243.039108                |             |             |
| HF=-1243.2998364 (Hartree/Particle)          |                             |             |             |
| <b>Compound C2 – Cu(I) complex at O17O18</b> |                             |             |             |
| 1 1                                          |                             |             |             |
| O                                            | -5.13189600                 | -1.43181300 | -0.23369100 |
| N                                            | -0.52480100                 | 2.96418000  | 0.31978400  |
| N                                            | -0.42088300                 | -1.19411900 | -0.20043800 |
| C                                            | -1.69421600                 | 0.86000800  | 0.05744800  |
| C                                            | -2.94883500                 | 1.51873600  | 0.14687300  |
| C                                            | -1.62099200                 | -0.53124000 | -0.11988500 |
| C                                            | -0.52225400                 | 1.63058800  | 0.14880800  |
| C                                            | -2.80255600                 | -1.27987300 | -0.20850900 |
| C                                            | -4.15437300                 | 0.74997100  | 0.05079900  |
| C                                            | -4.08156700                 | -0.59308800 | -0.12319500 |
| C                                            | -2.92986100                 | 2.89010600  | 0.32391300  |
| C                                            | 0.75185300                  | 0.94647100  | 0.05458700  |
| C                                            | -1.70197300                 | 3.56095500  | 0.40417800  |
| C                                            | 0.66773600                  | -0.52025600 | -0.11238400 |
| C                                            | -6.44268300                 | -0.85154500 | -0.18330100 |
| H                                            | -5.10293900                 | 1.26125900  | 0.11807200  |
| H                                            | -3.85274400                 | 3.44866800  | 0.40047700  |
| H                                            | -1.69348900                 | 4.63379200  | 0.54374800  |
| H                                            | -7.13347800                 | -1.67914900 | -0.29927200 |
| H                                            | -6.56554600                 | -0.13928100 | -0.99807500 |
| H                                            | -6.59757800                 | -0.36251200 | 0.77748000  |
| O                                            | 1.85217800                  | 1.51850600  | 0.10659300  |
| O                                            | 1.87738400                  | -1.09810100 | -0.17823100 |
| C                                            | 1.96237600                  | -2.54398700 | -0.26704100 |
| H                                            | 2.96948100                  | -2.71847500 | -0.63431500 |
| H                                            | 1.24283200                  | -2.88748200 | -1.00597000 |
| C                                            | 1.74968600                  | -3.19020900 | 1.08304100  |
| H                                            | 0.74228800                  | -3.01537300 | 1.45505800  |
| H                                            | 1.89950100                  | -4.26574600 | 0.98377500  |
| H                                            | 2.46765700                  | -2.80872500 | 1.80889100  |
| N                                            | -2.80076700                 | -2.59889900 | -0.36999900 |
| H                                            | -1.92429100                 | -3.09316500 | -0.42366500 |
| H                                            | -3.66889800                 | -3.10554100 | -0.42674000 |
| Cu                                           | 3.64219000                  | 0.46819200  | -0.12693300 |
| O                                            | 5.23722200                  | 0.66549900  | -1.51611700 |
| O                                            | 4.78318700                  | -0.70981500 | 1.33357000  |

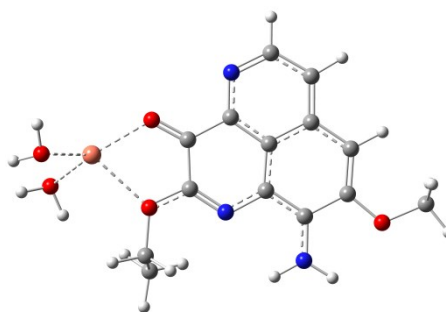

|                                              |             |             |                             |  |
|----------------------------------------------|-------------|-------------|-----------------------------|--|
| H                                            | 5.39519000  | 1.58659900  | -1.74774600                 |  |
| H                                            | 6.04253200  | 0.37206700  | -1.07657600                 |  |
| H                                            | 5.66375700  | -0.85298100 | 0.97042300                  |  |
| H                                            | 4.37873800  | -1.58368500 | 1.36107200                  |  |
| <b>Thermochemistry</b>                       |             |             |                             |  |
| Zero-point correction=                       |             |             | 0.309500 (Hartree/Particle) |  |
| Thermal correction to Energy=                |             |             | 0.335238                    |  |
| Thermal correction to Enthalpy=              |             |             | 0.336182                    |  |
| Thermal correction to Gibbs Free Energy=     |             |             | 0.253404                    |  |
| Sum of electronic and zero-point Energies=   |             |             | -1280.097308                |  |
| Sum of electronic and thermal Energies=      |             |             | -1280.071571                |  |
| Sum of electronic and thermal Enthalpies=    |             |             | -1280.070626                |  |
| Sum of electronic and thermal Free Energies= |             |             | -1280.153405                |  |
| HF=-1280.4068089 (Hartree/Particle)          |             |             |                             |  |
| <b>Compound C2 – Cu(I) complex at O18N1</b>  |             |             |                             |  |
| I 1                                          |             |             |                             |  |
| O                                            | -3.04835200 | -2.95812600 | 0.10584000                  |  |
| N                                            | -2.10001200 | 3.35048700  | -0.10212800                 |  |
| N                                            | 0.56139600  | 0.12231100  | -0.13220400                 |  |
| C                                            | -1.71194200 | 0.95897500  | -0.05402300                 |  |
| C                                            | -3.10996300 | 0.72281500  | -0.00827800                 |  |
| C                                            | -0.79522400 | -0.11730800 | -0.05776600                 |  |
| C                                            | -1.27356400 | 2.29324900  | -0.09858500                 |  |
| C                                            | -1.27679200 | -1.43516400 | 0.03380800                  |  |
| C                                            | -3.59753800 | -0.62180000 | 0.03924500                  |  |
| C                                            | -2.72012400 | -1.65164100 | 0.05528700                  |  |
| C                                            | -3.94859700 | 1.82398800  | -0.01168600                 |  |
| C                                            | 0.15956700  | 2.54829000  | -0.15371900                 |  |
| C                                            | -3.40057700 | 3.10844700  | -0.05898400                 |  |
| C                                            | 1.00178400  | 1.33507700  | -0.17429400                 |  |
| C                                            | -4.44452100 | -3.28589700 | 0.14492000                  |  |
| H                                            | -4.66428100 | -0.78593700 | 0.06729500                  |  |
| H                                            | -5.02169900 | 1.69477800  | 0.02154700                  |  |
| H                                            | -4.05618200 | 3.96901600  | -0.06096200                 |  |
| H                                            | -4.48859500 | -4.36859800 | 0.18052600                  |  |
| H                                            | -4.93906900 | -2.91681600 | -0.75244500                 |  |
| H                                            | -4.90189000 | -2.85936700 | 1.03645900                  |  |
| O                                            | 0.67790700  | 3.66253300  | -0.20377200                 |  |
| O                                            | 2.33168200  | 1.52218400  | -0.32435000                 |  |
| C                                            | 3.03015700  | 2.07021400  | 0.84434200                  |  |
| H                                            | 2.28904600  | 2.36914700  | 1.58294600                  |  |
| H                                            | 3.56546600  | 2.94900200  | 0.49621900                  |  |
| C                                            | 3.96212200  | 1.01514100  | 1.38814000                  |  |
| H                                            | 4.70666600  | 0.74047800  | 0.64096200                  |  |
| H                                            | 4.47690700  | 1.40519900  | 2.26713400                  |  |
| H                                            | 3.40153700  | 0.12227900  | 1.67679100                  |  |
| N                                            | -0.51801900 | -2.52319900 | 0.10206500                  |  |
| H                                            | 0.48495600  | -2.48766400 | 0.20232400                  |  |
| H                                            | -0.96902100 | -3.42106800 | 0.18374400                  |  |

|                                              |                             |             |             |  |
|----------------------------------------------|-----------------------------|-------------|-------------|--|
| Cu                                           | 2.27683600                  | -1.08186600 | -0.27394600 |  |
| O                                            | 4.01650600                  | -1.22442400 | -1.51113700 |  |
| O                                            | 2.53354300                  | -2.98428900 | 0.74658500  |  |
| H                                            | 4.45574000                  | -0.36772900 | -1.46955900 |  |
| H                                            | 4.61796600                  | -1.83710200 | -1.07398800 |  |
| H                                            | 2.75192400                  | -2.81728700 | 1.66990300  |  |
| H                                            | 3.31970600                  | -3.39077000 | 0.36563000  |  |
| <b>Thermochemistry</b>                       |                             |             |             |  |
| Zero-point correction=                       | 0.310034 (Hartree/Particle) |             |             |  |
| Thermal correction to Energy=                | 0.335211                    |             |             |  |
| Thermal correction to Enthalpy=              | 0.336156                    |             |             |  |
| Thermal correction to Gibbs Free Energy=     | 0.255668                    |             |             |  |
| Sum of electronic and zero-point Energies=   | -1280.094813                |             |             |  |
| Sum of electronic and thermal Energies=      | -1280.069635                |             |             |  |
| Sum of electronic and thermal Enthalpies=    | -1280.068691                |             |             |  |
| Sum of electronic and thermal Free Energies= | -1280.149179                |             |             |  |
| HF=-1280.4048464 (Hartree/Particle)          |                             |             |             |  |
| <b>Compound C2 – Cu(I) complex at O17N13</b> |                             |             |             |  |
| 1 1                                          |                             |             |             |  |
| O                                            | 4.99711900                  | -1.21943100 | -0.02573300 |  |
| N                                            | -1.37307600                 | -1.36993700 | 0.01978200  |  |
| N                                            | 1.36339400                  | 1.78514100  | -0.18132500 |  |
| C                                            | 0.91208300                  | -0.60328600 | -0.04433800 |  |
| C                                            | 1.38406200                  | -1.94117300 | 0.02109700  |  |
| C                                            | 1.80141800                  | 0.48184400  | -0.11013900 |  |
| C                                            | -0.46963100                 | -0.37624100 | -0.04035500 |  |
| C                                            | 3.17857100                  | 0.23955100  | -0.10236600 |  |
| C                                            | 2.79368200                  | -2.18400100 | 0.02788200  |  |
| C                                            | 3.65289000                  | -1.13408700 | -0.02942900 |  |
| C                                            | 0.43186700                  | -2.94607300 | 0.07871400  |  |
| C                                            | -0.95833500                 | 0.99339700  | -0.09852800 |  |
| C                                            | -0.92581200                 | -2.61992300 | 0.07548800  |  |
| C                                            | 0.10329400                  | 2.02706700  | -0.17962800 |  |
| C                                            | 5.57482800                  | -2.53048100 | 0.05064700  |  |
| H                                            | 3.14655600                  | -3.20283700 | 0.08068900  |  |
| H                                            | 0.72936500                  | -3.98426400 | 0.12889700  |  |
| H                                            | -1.67145300                 | -3.40061400 | 0.12279400  |  |
| H                                            | 6.64803800                  | -2.37674800 | 0.04442500  |  |
| H                                            | 5.27261200                  | -3.12141900 | -0.81286100 |  |
| H                                            | 5.26836300                  | -3.01910800 | 0.97446900  |  |
| O                                            | -2.15280400                 | 1.29385400  | -0.08493000 |  |
| O                                            | -0.39534300                 | 3.26764600  | -0.26478500 |  |
| C                                            | 0.53535600                  | 4.37885900  | -0.30494900 |  |
| H                                            | -0.04361500                 | 5.18722000  | -0.74121900 |  |
| H                                            | 1.35643200                  | 4.12344100  | -0.96975500 |  |
| C                                            | 1.01350400                  | 4.73746200  | 1.08384500  |  |
| H                                            | 1.57797200                  | 3.92271900  | 1.53325900  |  |
| H                                            | 1.66050900                  | 5.61291200  | 1.02059200  |  |

|    |             |             |             |
|----|-------------|-------------|-------------|
| H  | 0.16577600  | 4.98046900  | 1.72384300  |
| N  | 4.07788500  | 1.21889900  | -0.15963400 |
| H  | 3.76822300  | 2.17645200  | -0.20642200 |
| H  | 5.06175000  | 1.00708600  | -0.15115500 |
| Cu | -3.35393900 | -0.84153600 | 0.06316200  |
| O  | -4.68203200 | -0.28566100 | -1.60118800 |
| O  | -4.98269900 | -1.01757100 | 1.41173200  |
| H  | -4.31095000 | 0.51361400  | -1.98963700 |
| H  | -5.52303800 | -0.01088500 | -1.22084500 |
| H  | -5.80057200 | -1.05951600 | 0.90494800  |
| H  | -4.95974800 | -1.83088600 | 1.92611900  |

### Thermochemistry

Zero-point correction= 0.309304 (Hartree/Particle)  
 Thermal correction to Energy= 0.335240  
 Thermal correction to Enthalpy= 0.336185  
 Thermal correction to Gibbs Free Energy= 0.252701  
 Sum of electronic and zero-point Energies= -1280.105587  
 Sum of electronic and thermal Energies= -1280.079650  
 Sum of electronic and thermal Enthalpies= -1280.078706  
 Sum of electronic and thermal Free Energies= -1280.162190

HF=-1280.4148909 (Hartree/Particle)

### Compound C2 – Cu(I) complex at N14 O15

|     |             |             |             |
|-----|-------------|-------------|-------------|
| 1 1 |             |             |             |
| O   | 2.57740800  | -1.62293600 | -1.25687400 |
| N   | -3.41570500 | -2.16284400 | 0.85418500  |
| N   | -1.22898900 | 1.07773500  | -0.69437500 |
| C   | -1.35938500 | -1.29152600 | -0.05433600 |
| C   | -0.73379300 | -2.55535300 | 0.05411400  |
| C   | -0.65362600 | -0.17918100 | -0.57067600 |
| C   | -2.69249300 | -1.16170300 | 0.36201100  |
| C   | 0.65847000  | -0.33935300 | -0.95710100 |
| C   | 0.62120000  | -2.70873600 | -0.35639600 |
| C   | 1.29191400  | -1.62700400 | -0.84806000 |
| C   | -1.50698500 | -3.59700900 | 0.57074600  |
| C   | -3.32212400 | 0.16391900  | 0.25140900  |
| C   | -2.81952000 | -3.35484300 | 0.94917400  |
| C   | -2.44100200 | 1.24091800  | -0.32290300 |
| C   | 3.32426100  | -2.83651100 | -1.09162800 |
| H   | 1.08995000  | -3.67715600 | -0.26881400 |
| H   | -1.08818900 | -4.58830000 | 0.67768800  |
| H   | -3.41929300 | -4.16080500 | 1.34941600  |
| H   | 4.32664300  | -2.61216900 | -1.43898300 |
| H   | 2.88660600  | -3.63207200 | -1.69277400 |
| H   | 3.34363200  | -3.12022000 | -0.03957700 |
| O   | -4.46610100 | 0.41167800  | 0.58488600  |
| O   | -3.07550500 | 2.40592900  | -0.42091400 |
| C   | -2.33997800 | 3.54814600  | -0.93737000 |
| H   | -3.11920400 | 4.22689300  | -1.26950600 |

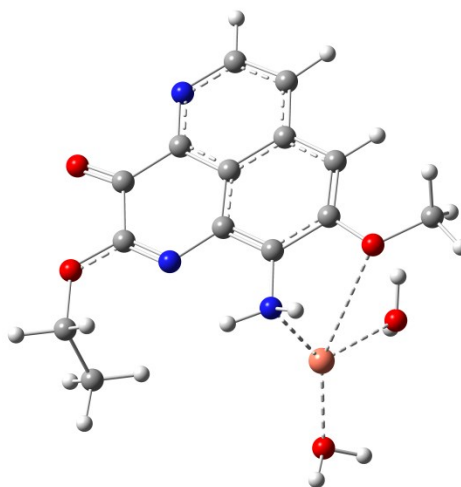

|                                               |             |             |                             |  |
|-----------------------------------------------|-------------|-------------|-----------------------------|--|
| H                                             | -1.75231800 | 3.22308400  | -1.79181200                 |  |
| C                                             | -1.48750200 | 4.17680900  | 0.14099200                  |  |
| H                                             | -0.71360100 | 3.49421000  | 0.48670300                  |  |
| H                                             | -1.00712900 | 5.06691100  | -0.26626100                 |  |
| H                                             | -2.10642600 | 4.47497800  | 0.98660900                  |  |
| N                                             | 1.43361600  | 0.73696400  | -1.38536000                 |  |
| H                                             | 0.87030900  | 1.53258300  | -1.66191900                 |  |
| H                                             | 2.11315600  | 0.48431600  | -2.09401100                 |  |
| Cu                                            | 2.59614000  | 1.13428400  | 0.32623700                  |  |
| O                                             | 3.17325300  | -0.46342900 | 1.68441900                  |  |
| O                                             | 3.40711700  | 2.73143200  | 1.41912000                  |  |
| H                                             | 2.73443600  | -1.30194700 | 1.50311700                  |  |
| H                                             | 2.93465600  | -0.24480800 | 2.59137700                  |  |
| H                                             | 3.80511900  | 3.39673100  | 0.84823200                  |  |
| H                                             | 4.12513100  | 2.40771600  | 1.97355700                  |  |
| <b>Thermochemistry</b>                        |             |             |                             |  |
| Zero-point correction=                        |             |             | 0.310317 (Hartree/Particle) |  |
| Thermal correction to Energy=                 |             |             | 0.335900                    |  |
| Thermal correction to Enthalpy=               |             |             | 0.336844                    |  |
| Thermal correction to Gibbs Free Energy=      |             |             | 0.253992                    |  |
| Sum of electronic and zero-point Energies=    |             |             | -1280.095919                |  |
| Sum of electronic and thermal Energies=       |             |             | -1280.070335                |  |
| Sum of electronic and thermal Enthalpies=     |             |             | -1280.069391                |  |
| Sum of electronic and thermal Free Energies=  |             |             | -1280.152243                |  |
| HF=-1280.4062353 (Hartree/Particle)           |             |             |                             |  |
| <b>Compound C3 – Cu(I) complex at O14 O15</b> |             |             |                             |  |
| I 1                                           |             |             |                             |  |
| O                                             | -1.58671400 | 3.81229100  | 0.08847300                  |  |
| C                                             | -0.74410500 | -0.19452300 | -0.41059900                 |  |
| C                                             | -2.03939600 | 0.28610700  | -0.28202200                 |  |
| C                                             | 0.26039100  | 0.77537000  | -0.35852700                 |  |
| C                                             | -0.52226400 | -1.56420900 | -0.56182200                 |  |
| C                                             | -2.42919800 | 1.58367400  | -0.11204300                 |  |
| C                                             | -1.40769500 | 2.59720600  | -0.05870600                 |  |
| C                                             | 0.80030000  | -1.99719800 | -0.67164300                 |  |
| C                                             | -2.96428900 | -1.87912600 | -0.45706900                 |  |
| H                                             | 1.02575800  | -3.04644000 | -0.78808300                 |  |
| H                                             | -3.84878100 | -2.49286500 | -0.47524900                 |  |
| C                                             | -1.71835300 | -2.39065800 | -0.58301600                 |  |
| H                                             | -1.61944800 | -3.45982300 | -0.70410400                 |  |
| C                                             | 1.56985000  | 0.33375400  | -0.46948500                 |  |
| O                                             | 2.61197500  | 1.22216000  | -0.36283600                 |  |
| C                                             | 3.12949000  | 1.65461900  | -1.64460200                 |  |
| H                                             | 3.54081300  | 0.80282700  | -2.18301700                 |  |
| H                                             | 2.32991000  | 2.12046100  | -2.21903000                 |  |
| H                                             | 3.90763700  | 2.38043000  | -1.42838700                 |  |
| N                                             | -0.11339300 | 2.09994000  | -0.19058500                 |  |
| H                                             | 0.62146700  | 2.79582000  | -0.15925100                 |  |
| N                                             | -3.14734200 | -0.49844100 | -0.29808300                 |  |

|                                              |                             |             |             |
|----------------------------------------------|-----------------------------|-------------|-------------|
| C                                            | -4.22451000                 | 0.37857000  | -0.12626700 |
| N                                            | -3.80544900                 | 1.62125300  | -0.01713100 |
| C                                            | -5.65579200                 | -0.04636300 | -0.07659500 |
| H                                            | -6.20753300                 | 0.88106100  | 0.08270500  |
| C                                            | -5.94703200                 | -0.97281800 | 1.11357700  |
| H                                            | -5.44694800                 | -1.93237000 | 0.97012900  |
| H                                            | -7.01970900                 | -1.17479900 | 1.10696600  |
| C                                            | -5.54004100                 | -0.36322100 | 2.44998200  |
| H                                            | -5.82914500                 | -1.01207800 | 3.27676800  |
| H                                            | -4.46013300                 | -0.21298400 | 2.50453600  |
| H                                            | -6.02172400                 | 0.60580000  | 2.59403400  |
| C                                            | -6.11341500                 | -0.66215600 | -1.40245100 |
| H                                            | -5.91793700                 | 0.01457500  | -2.23430400 |
| H                                            | -5.60994900                 | -1.60830400 | -1.60063700 |
| H                                            | -7.18549000                 | -0.85486200 | -1.35809400 |
| C                                            | 1.82152200                  | -1.04556000 | -0.62550400 |
| O                                            | 3.14081800                  | -1.35694900 | -0.71243300 |
| C                                            | 3.51510400                  | -2.73918700 | -0.61667500 |
| H                                            | 3.15831200                  | -3.28927300 | -1.48575700 |
| H                                            | 4.59996100                  | -2.74193600 | -0.59436600 |
| H                                            | 3.11853800                  | -3.17176700 | 0.30084900  |
| Cu                                           | 4.41398200                  | 0.01604500  | 0.77086400  |
| O                                            | 6.14620600                  | 0.65739300  | -0.13372900 |
| O                                            | 3.32710000                  | -0.77435000 | 2.36389600  |
| H                                            | 5.95179100                  | 1.33582000  | -0.78958900 |
| H                                            | 6.74945400                  | 1.07101900  | 0.49273300  |
| H                                            | 2.39106600                  | -0.82208200 | 2.13824800  |
| H                                            | 3.37140000                  | -0.22286200 | 3.15225300  |
| <b>Thermochemistry</b>                       |                             |             |             |
| Zero-point correction=                       | 0.404045 (Hartree/Particle) |             |             |
| Thermal correction to Energy=                | 0.433605                    |             |             |
| Thermal correction to Enthalpy=              | 0.434549                    |             |             |
| Thermal correction to Gibbs Free Energy=     | 0.343220                    |             |             |
| Sum of electronic and zero-point Energies=   | -1436.085084                |             |             |
| Sum of electronic and thermal Energies=      | -1436.055524                |             |             |
| Sum of electronic and thermal Enthalpies=    | -1436.054580                |             |             |
| Sum of electronic and thermal Free Energies= | -1436.145909                |             |             |
| HF=-1436.489129 (Hartree/Particle)           |                             |             |             |
| <b>Compound C3 – Cu(I) complex at O18N19</b> |                             |             |             |
| 1 1                                          |                             |             |             |
| O                                            | 0.62373400                  | -2.95751800 | -0.31870300 |
| C                                            | -1.70452500                 | 0.44271100  | -0.16153300 |
| C                                            | -0.31998000                 | 0.49147400  | -0.19256900 |
| C                                            | -2.26043200                 | -0.83785500 | -0.19708500 |
| C                                            | -2.44016900                 | 1.62654100  | -0.09766900 |
| C                                            | 0.53841500                  | -0.56742500 | -0.24832300 |
| C                                            | -0.01571800                 | -1.89471800 | -0.27748700 |
| C                                            | -3.83028400                 | 1.52066000  | -0.07380700 |
| C                                            | -0.30191600                 | 2.85489400  | -0.09845900 |



|    |             |             |             |
|----|-------------|-------------|-------------|
| H  | -4.44174600 | 2.40876300  | -0.02930300 |
| H  | 0.28228200  | 3.75881500  | -0.07104500 |
| C  | -1.65309300 | 2.84947000  | -0.06339000 |
| H  | -2.16061200 | 3.80172800  | -0.00738700 |
| C  | -3.64303500 | -0.93329400 | -0.17216400 |
| O  | -4.24762200 | -2.16182600 | -0.24330400 |
| C  | -4.62854300 | -2.67792500 | 1.05265600  |
| H  | -3.74120400 | -2.80129900 | 1.67264900  |
| H  | -5.33362700 | -1.99994900 | 1.52978000  |
| H  | -5.09662700 | -3.64037500 | 0.87100500  |
| N  | -1.39999000 | -1.92592200 | -0.25734700 |
| H  | -1.81250100 | -2.85127400 | -0.26934100 |
| N  | 0.40310200  | 1.64195000  | -0.17112200 |
| C  | 1.73570500  | 1.25550600  | -0.21662500 |
| N  | 1.82420500  | -0.06300800 | -0.26417700 |
| C  | 2.90638900  | 2.18058500  | -0.21414000 |
| H  | 3.77207100  | 1.51681900  | -0.27755100 |
| C  | 3.01351200  | 2.96211700  | 1.10348800  |
| H  | 2.18002600  | 3.66193800  | 1.18917300  |
| H  | 3.92373900  | 3.56126500  | 1.04495000  |
| C  | 3.06572400  | 2.04786600  | 2.32196600  |
| H  | 3.23572300  | 2.62320500  | 3.23187400  |
| H  | 2.13153500  | 1.49638900  | 2.44454800  |
| H  | 3.87434800  | 1.32065000  | 2.22203500  |
| C  | 2.90486000  | 3.10249500  | -1.43662200 |
| H  | 2.84315200  | 2.52565400  | -2.35931700 |
| H  | 2.07202100  | 3.80463900  | -1.40969800 |
| H  | 3.83029900  | 3.67803500  | -1.44898500 |
| C  | -4.41268500 | 0.24872700  | -0.11407100 |
| O  | -5.75086300 | 0.03938500  | -0.10722100 |
| C  | -6.60662300 | 1.18724900  | -0.03599500 |
| H  | -6.45680300 | 1.82629600  | -0.90511600 |
| H  | -7.61774400 | 0.79468800  | -0.03388600 |
| H  | -6.41998700 | 1.74243600  | 0.88230700  |
| Cu | 3.54670100  | -1.08682700 | -0.18460600 |
| O  | 3.15930700  | -3.12625300 | 0.81036500  |
| O  | 5.55177800  | -1.51393200 | -0.44103100 |
| H  | 2.27046200  | -3.15123700 | 0.40922400  |
| H  | 3.69407700  | -3.73272200 | 0.28877700  |
| H  | 5.86805500  | -1.33100100 | -1.33211400 |
| H  | 5.68122700  | -2.45992500 | -0.31035200 |

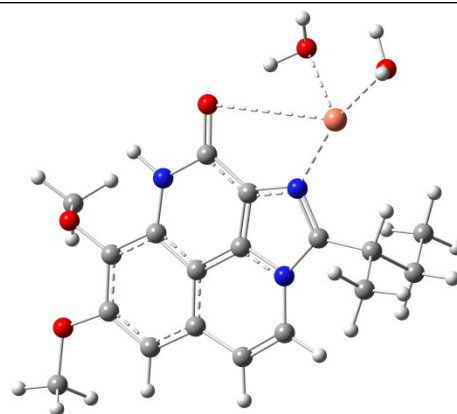

#### Thermochemistry

|                                              |                             |
|----------------------------------------------|-----------------------------|
| Zero-point correction=                       | 0.403684 (Hartree/Particle) |
| Thermal correction to Energy=                | 0.433386                    |
| Thermal correction to Enthalpy=              | 0.434331                    |
| Thermal correction to Gibbs Free Energy=     | 0.342231                    |
| Sum of electronic and zero-point Energies=   | -1436.097728                |
| Sum of electronic and thermal Energies=      | -1436.068026                |
| Sum of electronic and thermal Enthalpies=    | -1436.067081                |
| Sum of electronic and thermal Free Energies= | -1436.159181                |

HF=-1436.501412 (Hartree/Particle)

**Table S8:** Lowest absorption wavelength (nm) of **C1–C3** calculated by TD-DFT with different methods of various % HF in exchange correlation.

| Method                    | %HF   | Absorption / nm |     |     |
|---------------------------|-------|-----------------|-----|-----|
|                           |       | C1              | C2  | C3  |
| B3LYP                     | 20    | 471             | 482 | 332 |
| B98                       | 22    | 465             | 476 | 327 |
| M06                       | 27    | 461             | 472 | 329 |
| PBE0                      | 25    | 459             | 470 | 322 |
| CAM-B3LYP*                | 19/65 | 427             | 439 | 298 |
| M05-2X                    | 56    | 423             | 435 | 292 |
| Exp. (ref. <sup>4</sup> ) |       | 398             | 402 | 350 |

\*19 % HF at short-range and 65 % HF at long-range
